# 1 **Fractal scaling of *C. elegans* behavior is shaped by insulin signaling**

2

## 3 **Authors**

4 Yukinobu Arata<sup>1,\*</sup>, Itsuki Shiga<sup>2,§</sup>, Yusaku Ikeda<sup>1,3,§</sup>, Peter Jurica<sup>1</sup>, Hiroshi Kimura<sup>3</sup>, Ken Kiyono<sup>2</sup>, and  
5 Yasushi Sako<sup>1</sup>

6

## 7 **Affiliations**

8 1. Cellular Informatics Laboratory, Cluster for Pioneering Research (CPR), RIKEN, 2-1 Hirosawa,  
9 Wako, Saitama, 351-0198, Japan

10 2. Graduate School of Engineering Science, Osaka University, 1-3 Machikaneyama-cho, Toyonaka,  
11 Osaka, 560-8531, Japan

12 3. Department of Mechanical Engineering, School of Engineering, Tokai University, 4-1-1  
13 Kitakaname, Hiratsuka, Kanagawa, 259-1292, Japan

14 § Equal contribution

15 \* Corresponding author

16

## 17 **Abstract**

18 Fractal scaling governs the complex behavior of various animal species and, in humans, can be altered  
19 by neurodegenerative diseases and aging<sup>1</sup>. However, the mechanism underlying fractal scaling remains  
20 unknown. Here, we videorecorded *C. elegans* that had been cultured in a microfluidic device for 3  
21 days and analyzed temporal patterns of *C. elegans* actions by fractal analyses. The residence-time  
22 distribution of *C. elegans* shared a common feature with those of human and mice<sup>2-4</sup>. Specifically, the  
23 residence-time power-law distribution of the active state changed to an exponential-like decline at a  
24 longer time scale, whereas this change did not occur in the inactive state. The exponential-like decline  
25 disappeared in starved *C. elegans* but was restored by culturing animals with glucose. The exponential-  
26 like decline similarly disappeared in insulin-signaling *daf-2* and *daf-16* mutants. Therefore, we  
27 conclude that insulin signaling regulates fractal scaling of *C. elegans* behavior. Our findings indicate  
28 that neurosensory modulation of *C. elegans* behavior by insulin signaling is achieved by regulation of  
29 fractal scaling. In humans, diabetes mellitus is associated with depression, bipolar disorder, and  
30 anxiety disorder<sup>5</sup>, which affect daily behavioral activities. We hypothesize that comorbid behavioral  
31 defects in patients with diabetes may be attributed to altered fractal scaling of human behavior.

32

### 33 **Main**

34 In humans, ordinary daily activities<sup>2</sup> and social behaviors, such as sports and communication<sup>4</sup>, tend to  
35 occur consecutively as a burst, and then suddenly cease for several days to months. These episodic  
36 bouts of behavior have also been observed in other vertebrates (mice<sup>3</sup>) and invertebrates (*C. elegans*<sup>6</sup>,  
37 flies<sup>7</sup>, and ants<sup>8</sup>). Activity time series of episodic behavioral bouts have non-periodic and intermittent  
38 patterns that appear repeatedly across a broad range of time scales. Such self-similar geometrical  
39 patterns across time scales are called fractal patterns; therefore, activity time series of animal behavior  
40 are characterized by fractal geometry. Neurodegenerative disorders (e.g., Alzheimer and Parkinson  
41 diseases) and aging<sup>1</sup> have been shown to alter the fractal scaling of human behavior. These findings  
42 suggest that fractal scaling of animal behavior is regulated by neurophysiological mechanisms that are  
43 conserved among various animal species.

44 Daily and social-behavioral activities are affected by a broad range of neurophysiological states  
45 in the human brain. Among them, mood, an unconscious disposition to respond emotionally to objects  
46 or events encountered in life<sup>5</sup>, and a reward evaluation for each object or event<sup>9</sup> are thought to play  
47 important roles. Insulin signaling has been shown to affect mood and the reward system in mouse and  
48 human brains<sup>10</sup>. Mice with a brain neuron-specific knockout of the insulin receptor gene (NIRKO  
49 mice) did not show defects in neuron proliferation or death during brain development; however, they  
50 did show age-related anxiety and depressive-like behaviors<sup>11</sup>. In humans, mood is improved by nasal  
51 administration of insulin in both healthy individuals and patients with diabetes, suggesting that insulin  
52 signaling is involved in mood control<sup>12</sup>. Insulin signaling, which has evolved in relation to the mood  
53 and reward systems in brain in higher animals, modulates the relation between olfactory stimuli and  
54 behavior in nematodes and flies<sup>10</sup>. Thus, insulin signaling is an evolutionarily conserved signaling  
55 system that coordinates external stimulation and animal behavior. However, how insulin signaling  
56 affects the fractal scaling of animal behavior remains uninvestigated.

57 In the present study, we applied a genetic analysis of the fractal scaling of animal behavior by  
58 studying *C. elegans* behavior. Alternative switching between an actively moving state (“active state”)  
59 and an inactive state in episodic behavior is a common feature of various animal species. Therefore,  
60 we dissected the fractal scaling of *C. elegans* behavior on a two-state transition model<sup>6</sup>. Generally,  
61 kinetics that governs the state transition can be inferred from statistical properties, such as the  
62 frequency distribution and temporal correlation of experimentally measured residence times in each  
63 state. Inferred kinetics provides insights into the underlying mechanisms that drive the state transition.  
64 Through longitudinal videorecording of *C. elegans* swimming behavior, we found that state transitions  
65 between active and inactive states in *C. elegans* episodic behavior are driven by kinetics that

66 determines residence times by following frequency distributions and temporal correlations with fractal  
67 properties. Therefore, we refer to the kinetics as “fractal kinetics”<sup>6</sup>.

68 Next, we extended the function of the microfluidic device for culturing *C. elegans* with food  
69 bacteria. Our observations revealed that the fractal kinetics of *C. elegans* behavior is regulated by  
70 insulin signaling. Based on recent neuronal network modelling and molecular biological studies, we  
71 discuss the possibility that insulin signaling regulates neural activity in the brain to modulate fractal  
72 scaling of *C. elegans* behavior. We also discuss the applicability of this mechanism for mood disorders  
73 that are comorbid with diabetes mellitus in humans. We propose that fractal behavioral analysis can  
74 provide a more integrated clinical view of psychiatric symptoms in patients with diabetes, which may  
75 contribute to the development of new diagnostic indices and improvement of clinical treatment.

76

### 77 **Residence-time power-law distributions in active and inactive states in *C. elegans* episodic behavior**

78 To study the effects of diet on fractal scaling of *C. elegans* behavior, we constructed a new microfluidic  
79 device composed of an array of 50 chambers for culturing individual animals by perfusing M9 buffer  
80 containing food bacteria (WormFloII, Fig. 1). We recorded *C. elegans* swimming under controlled  
81 chemical, temperature, and light intensity conditions at 20 frames per second (fps) for 3 days<sup>6</sup>. By  
82 analyzing recorded movies using an image-processing program<sup>6</sup>, we obtained time series of behavioral  
83 activity with  $10^5$  time points (Fig. 2a-e). In the activity time series, we confirmed that fed wild-type  
84 animals cultured on the device showed repeated active and inactive episodes (Fig. 2b, c), as observed  
85 in *C. elegans* cultured in liquid and solid agar medium<sup>6</sup>. These findings indicate that our culture system  
86 allowed us to observe the physiological behavior of *C. elegans*.

87 To analyze the fractal scaling of *C. elegans* behavior based on a two-state transition model, we  
88 measured the residence times of the active and inactive states, which alternatively appeared along the  
89 activity time series. Residence-time series in the active or inactive state were plotted across the round  
90 as “duration round series” (DRS) (Fig. 2f, g), analogous to “activity time series”. DRS in fed wild-  
91 type animals revealed that residence times in the active state varied from sub-seconds to 10 seconds,  
92 whereas residence times in the inactive state varied from sub-seconds to 100 seconds (Fig. 2f, g). In  
93 the inactive state, residence times followed a power-law distribution in the range of sub-seconds to  
94 >10 seconds (Fig. 3b). In the active state, residence times followed a power-law distribution in a shorter  
95 range, from sub-seconds to <10 seconds (Fig. 3a). This power-law distribution indicates that the  
96 appearance frequency of the residence time decreased on the time scale in a certain ratio across a broad  
97 range of residence times. In other words, the appearance frequency decreases in a self-similar manner,  
98 which is indicative of fractal scaling in the residence time. Interestingly, at a longer time scale, the  
99 frequency distribution of residence time in the active state showed a faster decline than the power-law

100 distribution. Such a convex decline in the log-log plot is seen in an exponential distribution. A similar  
101 combination of frequency distributions with and without the exponential-like decline in active and  
102 inactive states, respectively, was reported in Japanese quail, mice, and humans<sup>2-4,13</sup>. Thus, the  
103 frequency distribution of *C. elegans* episodic swimming has a common scaling property to vertebrates.

104 Next, we studied the behavioral activity of *C. elegans* that had been cultured in M9 buffer alone  
105 (starved wild-type animals) or cultured with 1 g/L glucose (glucose-fed wild-type animals) (Extended  
106 Data Fig. 1). The residence-time distribution of starved wild-type animals did not show a detectable  
107 exponential-like decline in either the active or inactive state (Extended Data Fig. 2a,b)<sup>6</sup>. In glucose-  
108 fed wild-type animals, the exponential-like decline was restored in the active state (Extended Data Fig.  
109 2c, d), raising the possibility that insulin signaling is involved in regulation of fractal scaling of *C.*  
110 *elegans* behavior. To test this possibility, we studied the *daf-2* (Fig. 2h-n) and *daf-16* (Fig. 2t-u)  
111 insulin-signaling mutant animals. *daf-2* and *daf-16* are mutants of the insulin receptor gene and of the  
112 downstream forkhead transcription factor gene, respectively<sup>14</sup>. In both cases, the insulin-signaling  
113 mutants showed increased frequency of the long-lasting active state compared to wild-type animals,  
114 such that the exponential-like decline at the longer time scale disappeared in the active state (Fig. 3c-  
115 3f). Additionally, through quantitative analysis of the power-law distribution, we found that the  
116 absolute value of the power-law exponent in the active state at the shorter time scale became larger in  
117 an insulin signaling-dependent manner ( $p < 0.05$ , Extended Data Fig. 3 and Supplementary  
118 Discussion). Therefore, we conclude that the mechanism to determine residence-time distribution in  
119 the active but not the inactive state is controlled by insulin signaling (Supplementary Discussion).

120

### 121 **Long-range correlation in duration-round series of active and inactive states in *C. elegans* episodic behaviors**

122 To further study the insulin signaling-dependent control of fractal scaling of *C. elegans* behavior, we  
123 focused on the autocorrelation of DRSs. When the autocorrelation of one-dimensional data series  
124 declines with time lag  $\tau$  in a power-law manner ( $C(\tau) \sim \tau^{-\gamma}$ ), such an autocorrelation is referred to  
125 as “long-range correlation,” due to the long tail in the power-law distribution. A power-law distribution  
126 of autocorrelation indicates that autocorrelation declines in a certain ratio across a broad range of time-  
127 lags, i.e., autocorrelation declines in a self-similar manner, which is indicative of fractal scaling across  
128 the round of residence times.

129 To study the long-range correlation in fractal scaling of *C. elegans* behavior, we employed  
130 higher-order detrending moving-average analysis (DMA)<sup>15</sup>. In DMA and its two-variable extension,  
131 detrending moving-average cross-correlation analysis (DMCA), when the fluctuation functions ( $F(s)$   
132 or  $F^{(1,2)}(s)$ , equations (1), (2)) follow a power law with scale ( $s$ ) ( $F(s) \sim s^\alpha$  or  $F^{(1,2)}(s) \sim s^\alpha$ ),  $\alpha$   
133 corresponds to the Hurst exponent ( $H$ )<sup>15,16</sup>.  $H$  obtained by DMA and DMCA has a direct



134 mathematical link with other conventional indices for long-range correlation: i.e., the scaling exponent  
135  $\gamma$  in autocorrelation ( $\gamma = 2 - 2\alpha$ , for  $0 < \gamma < 1$ ) and the scaling exponent  $\beta$  in power spectral  
136 density  $P(f) \sim f^{-\beta}$ , where  $f$  is the frequency ( $\beta = 2\alpha - 1$ , for  $\beta > -1$ )<sup>17</sup>. Compared to  
137 conventional algorithms, DMA has several advantages for estimating long-range correlation for  
138 scaling exponent  $\gamma$  or  $\beta$ , due to the availability of a fast algorithm and improved trend removal  
139 process<sup>15</sup>. When  $H = 0.5$ , the time series had no temporal correlation (i.e., like white noise), whereas  
140 when  $0.5 < H < 1$ , the time series had a long-range correlation. Although long-range correlation of  
141 the time series cannot be simply extended to  $H > 1$  due to  $0 < \gamma < 1$ , fractal scaling of the time  
142 series can be characterized by  $H > 1$ . When  $H$  is larger ( $H > 0.5$ ), there is a stronger tendency for  
143 values in the time series to continuously increase or decrease<sup>6,18</sup>. Therefore, in our study, we classified  
144 fractal scaling of the time series as “no memory” at  $H = 0.5$ , “weak fractal memory” for  $0.5 < H <$   
145  $1$ , and “strong fractal memory” at  $H > 1$ . Note that we used  $H$  of the integrated time series to  
146 characterize fractal scaling of the original time series, by following a standard algorithm of DMA  
147 (Methods).

148 The Hurst exponent of DRS of the active state (active DRS) at shorter round scale ( $< 100$   
149 rounds,  $H_{a1} = 0.70$ ) and that at longer round scale ( $> 100$  rounds,  $H_{a2} = 0.72$ ) (Fig. 4a), and the  
150 Hurst exponent of DRS of the inactive state (inactive DRS) ( $H_i = 0.68$ , Fig. 4a) indicate that the active  
151 and inactive DRS have weak fractal memories, consistent with our previous study<sup>6</sup>. We did not find  
152 strong evidence for insulin signaling-dependent control of the mechanism to determine temporal  
153 correlations in active and inactive DRSs (Extended Data Figs. 4, 5a-f and Supplementary Discussion).

154

#### 155 **Cross-correlation between duration round series of active and inactive states in *C. elegans* episodic behavior**

156 To study the relation between active and inactive DRSs, we estimated the cross-correlation coefficients  
157 between two DRSs at various temporal scales (multiscale cross-correlation coefficient,  $\rho^{(1,2)}(s)$ ,  
158 equation (3)). Fed wild-type animals showed a remarkable negative correlation at longer round scales  
159 (Fig. 4b, Extended Data Fig. 6). The negative correlation at longer round scale ( $\log_{10}(s) = 2.5$ ) in fed  
160 wild-type animals ( $\rho_{2.5} = -0.35$ ) was significantly weakened in insulin-signaling mutant animals  
161 ( $\rho_{2.5} = -0.10$  and  $\rho_{2.5} = -0.10$  in fed *daf-2* and fed *daf-16* mutants, respectively, Fig. 4e, h,  $p <$   
162  $0.05$ , Extended Data Fig. 6) and in starved wild-type animals ( $\rho_{2.5} = -0.09$ , Extended Data Fig. 4b,  
163 and  $p < 0.05$ , Extended Data Fig. 6). The negative correlation in starved wild-type animals ( $\rho_{2.5} =$   
164  $-0.09$ ) was restored in glucose-fed wild-type animals ( $\rho_{2.5} = -0.13$ , Extended Data Fig. 4e,  $p <$   
165  $0.05$ , Extended Data Fig. 6). These results indicate that there is a lateral linking mechanism between  
166 the two fractal kinetics (to determine active and inactive DRSs) at longer round scale, whose switch is  
167 modulated by insulin signaling.

168 Next, to study the *long-range* cross-correlation between active and inactive DRSs, we  
169 employed DMCA. In fed wild-type animals, Hurst exponents of a cross-correlated component between  
170 active and inactive DRSs at a shorter round scale ( $H_{c1} = 1.47$ ) and at a longer round scale ( $H_{c2} =$   
171  $0.79$ ) (Fig. 4c) indicate that active and inactive DRSs contain a cross-correlated fractal component  
172 with strong fractal memory at a shorter round scale and weak fractal memory at a longer round scale.  
173 At a shorter round scale,  $H_{c1}$  in fed wild-type animals (1.47) was decreased in insulin-signaling  
174 mutants (1.27 and 1.28 in fed *daf-2* and fed *daf-16* mutants, respectively; Fig. 4f, i,  $p <$   
175  $0.05$ , Extended Data Fig. 5g, h) and in starved wild-type animals (1.00) ( $p < 0.05$ , Extended Data Fig.  
176 5g, h). Additionally,  $H_{c1}$  in starved wild-type animals (1.00) was restored in glucose-fed wild-type  
177 animals (1.20) ( $p < 0.05$ , Extended Data Fig. 5g, h). These results indicate that the strength of fractal  
178 memory in the cross-correlated component, unlike the fractal memories of active and inactive DRSs,  
179 is controlled by insulin signaling.

180 To our knowledge, there is no simple model to increase the strength of fractal memory by  
181 coupling simple models that generate time series with a weaker fractal memory<sup>19</sup>. Therefore, we  
182 consider that DRS with strong fractal memory generated by an upstream fractal kinetics is provided to  
183 both the active and inactive DRSs as a pseudo-cross-correlated component via a vertical interaction  
184 mechanism. On the other hand, at longer round scale,  $H_{c2}$  in fed wild-type animals (0.79, Fig. 4c)  
185 was comparable to the fractal memory of the active or inactive DRSs in fed wild-type animals (0.72  
186 and 0.68, Fig. 4a). These values did change significantly in insulin-signaling mutants (0.81 and 0.87  
187 in fed *daf-2* and fed *daf-16* mutants, respectively; Fig. 4f, i, Extended Data Fig. 5i, j). Due to the  
188 comparable strength of fractal memory in  $H_{c2}$  compared to those in  $H_{a2}$  and  $H_i$ , the presence of an  
189 upstream fractal kinetics for a cross-correlated component remained unclear. It is possible that the  
190 DRS generated by fractal kinetics to generate active or inactive DRS was provided to the other DRS  
191 as a cross-correlated component via a lateral linking mechanism, which may be the same as the lateral  
192 linking mechanism found by the multiscale cross-correlation coefficient above. How insulin signaling-  
193 dependent behavioral control detected by DRS-based analyses alter the temporal activity patterns of  
194 *C. elegans* behavior are discussed in the Supplementary Discussion (Extended Data Figs. 7, 8).

195

## 196 Discussion

### 197 Fractal scaling of *C. elegans* behavior and insulin signaling-dependent control of neural activity in brain

198 Based on our fractal analyses, we dissected the fractal scaling of *C. elegans* behavior using a two-state  
199 transition model between active and inactive states (Fig. 5). State transition from the active to inactive  
200 state is driven by kinetics that determine residence time in the active state by following power-law and  
201 exponential-like distributions at shorter and longer time scales (Fig. 3a). The temporal correlation of

202 residence times across the round is determined by following weak fractal memories with distinct  
203 strengths at shorter and longer round scales ( $H_{a1}$  and  $H_{a2}$ ; Fig. 4a). We refer to such kinetics as  
204 Fractal Kinetics A1 and A2, respectively. The temporal correlation determined by Fractal Kinetics A1  
205 is affected by Fractal Kinetics C, which determines the temporal correlation by following strong fractal  
206 memory, via the vertical linking mechanism ( $H_{c1}$ ; Fig. 4c). The temporal correlation determined by  
207 Fractal Kinetics A2 is affected by Fractal Kinetics I via the lateral linking mechanism ( $\rho_{2.5}$ ; Fig. 4).  
208 On the other hand, the state transition from the inactive to active state is driven by kinetics that  
209 determines the residence time in the inactive state by following power-law distributions (Fig. 3b). The  
210 temporal correlation of residence times across the round is determined by following weak fractal  
211 memory ( $H_i$ ; Fig. 4a). We refer to such kinetics as Fractal Kinetics I. The temporal correlation  
212 determined by Fractal Kinetics I is affected by Fractal Kinetics C via the vertical linking mechanism  
213 at shorter round scale ( $H_{c1}$ ; Fig. 4c) and by Fractal Kinetics A2 via the lateral linking mechanism at  
214 longer round scale ( $\rho_{2.5}$ ; Fig. 4). Insulin signaling modulates the mechanism for determining the  
215 residence-time distribution in Fractal Kinetics A1 and A2 (Fig. 3), and the mechanism for determining  
216 fractal memory in Fractal Kinetics C ( $H_{c1}$ ; Fig. 4c, f, i). Insulin signaling also targets the switch for  
217 the lateral linking mechanism between Fractal Kinetics A2 and I ( $\rho_{2.5}$ ; Fig. 4b, e, h) to shape fractal  
218 scaling of *C. elegans* behavior.

219 The generator of fractal kinetics may reside in the neural network in *C. elegans* brains. Power-  
220 law distributions have been observed in the duration of the sequential firing of neurons, called a  
221 “neuronal avalanche”, on cultured rat brain slices<sup>20</sup> and in cat, monkey, and human brains *in vitro* and  
222 *in vivo*<sup>21</sup>. The power-law exponent of neuronal avalanche dynamics in the brain varies depending on  
223 the resting or task-performing behavioral state<sup>22</sup> and on a wide range of neurogenic or psychiatric  
224 diseases in humans<sup>23</sup>. Exponents of the power-law distribution of neuronal avalanche are commonly  
225 distributed around -2, which approximately coincides with the power-law exponents determined by  
226 behavioral fractal kinetics A1 and A2 in *C. elegans* (Extended Data Fig. 3). A power law with a slope  
227 of -2 (second power law) in behavioral fractal kinetics is widely observed in invertebrates and  
228 vertebrates, including *Drosophila*<sup>7</sup>, Japanese quail<sup>13</sup>, mouse<sup>3</sup>, and human<sup>2,4</sup>. These observations  
229 strongly suggest that the power-law distribution in brain neuronal avalanche underlies the power-law  
230 distribution in behavioral fractal kinetics. Moreover, the second power law of neuronal avalanche has  
231 been reproduced by various theoretical neural network (NN) models<sup>21</sup>, including: stochastic NN  
232 models based on second-order phase transition (referred to as “criticality”)<sup>24</sup>, a deterministic model  
233 based on a feed forward-type NN model<sup>25,26</sup>, and another deterministic model based on the “edge of  
234 chaos” model<sup>27</sup>. Together, these findings suggest that behavioral fractal kinetics are derived from the  
235 conserved property of collective neural dynamics in animal brains among a wide variety of species.

236 Previous theoretical model analyses and subsequent experiments consistently explain the  
237 altered power-law residence-time distribution in fractal kinetics A1/A2 in insulin-signaling mutants  
238 (Fig. 3c, e). In previous stochastic and deterministic NN models, the power-law distribution of  
239 neuronal avalanche duration changes to an exponential-like decline at longer time scale, as we found  
240 in fed wild-type animals (Fig. 2a), when the maximum number of neurons in the model is reduced or  
241 neural connectivity is weakened<sup>27-29</sup>. These models suggest that negative interventions on propagation  
242 of neuronal firing in the network cause the exponential-like decline. This prediction has been validated  
243 in experiments using cultured rat brain slices. When a brain slice was cultured with an inhibitory  
244 neuron antagonist (i.e., picrotoxin), the average neuronal avalanche duration was elongated, such that  
245 the exponential-like decline disappeared from the frequency distribution observed in a brain slice  
246 cultured without the antagonist. With an inhibitory neuron antagonist, the frequency distribution at the  
247 longer time scale was beyond the power-law distribution<sup>20,30</sup>, similar to what we observed in fed *daf-*  
248 *2* and fed *daf-16* animals (Fig. 3c, e). These theoretical and experimental evidences suggest that the  
249 exponential-like decline in the residence-time distribution observed in *C. elegans* and other  
250 animals<sup>3,4,13,31</sup> may be derived from some negative effects on brain neural activity by insulin signaling.

251 Previous molecular biological analyses have shown that insulin signaling has multifaced  
252 functions in brain<sup>32,33</sup>. In mammals, insulin acts as a neuropeptide to activate the GABA inhibitory  
253 ganglia in amygdala<sup>34</sup>, a key brain region connecting emotion/mood with food intake, providing a  
254 negative effect on neural activity. In *C. elegans*, GABA inhibitory D type-motor neurons (D-MNs) are  
255 involved in behavioral threat-reward decision making<sup>35</sup>. Our findings, together with previous  
256 theoretical and experimental studies, raise the possibility that insulin signaling in *C. elegans* activates  
257 GABA inhibitory neurons and alters the power-law neuronal avalanche distribution to be exponential-  
258 like, thereby changing the accompanying power-law residence-time distribution to be exponential-like.

259 How fractal kinetics I and C are generated, and how their interactions in the kinetic regulatory  
260 pathway (Fig. 5) are achieved in the *C. elegans* brain, remain unknown. We assume that the mechanism  
261 to determine the power law and exponential-like distribution of residence time in the active state shared  
262 in fractal kinetics A1 and A2 is generated from the specific neuronal network containing D-MNs in *C.*  
263 *elegans* (or the neuronal network in mammalian amygdala). In that case, fractal kinetics I and C may  
264 be generated from other distinct functional units in *C. elegans* and mammalian brains, and these  
265 functional units for fractal kinetics may structurally interact with each other in brain, as shown in Fig.  
266 5. Considering the universality of power-law exponents of animal behavior and neuronal avalanche,  
267 the consistency of model prediction and experiments, and the evolutionary conservation of insulin  
268 signaling, the insulin-dependent control of fractal kinetics in the kinetic regulatory pathway (Fig. 5)  
269 may be conserved in fractal behavioral scaling in other animals.

270

## 271 **Insulin signaling and fractal human behavior**

272 In humans, diabetic mellitus is associated with mood disorders, such as depression, bipolar disorder,  
273 and generalized anxiety disorder<sup>5</sup>, which affect daily behavioral activities, including food intake, sleep,  
274 communication, or social activities. These activities occur at different time scales. Our *C. elegans*  
275 fractal behavioral analysis raises the possibility that daily behavioral disorders in patients with diabetes  
276 at different time scales may be attributed to a disorder in fractal scaling of human behavior. This  
277 possibility could be tested through long-term measurements of human behavior in patients with  
278 diabetes and their evaluation by statistical fractal indices determined by the power-law residence-time  
279 distribution, cross-correlation coefficient ( $\rho^{(1,2)}(s)$ ), and long-range cross-correlation ( $H_{c1}$ ) (which,  
280 in the current study, were found to be regulated by insulin signaling). In parallel, statistical fractal  
281 indices obtained from behavioral dynamics in healthy individuals and patients with diabetes can be  
282 evaluated by a theoretical NN model representing the human brain structure<sup>36</sup>. Model analyses would  
283 provide additional multifaceted connections of multiple properties in behavioral fractal kinetics with  
284 brain neural activity. Together, the combination of long-term measurements, fractal statistical analysis,  
285 and theoretical neurodynamic modeling of fractal scaling of human behavior is expected to provide a  
286 more integrated clinical view of psychiatric symptoms in human patients with diabetes, which could  
287 contribute to the development of new diagnostic indices and the improvement of clinical treatment.

288

## 289 **Methods**

### 290 ***C. elegans* strains and maintenance**

291 *C. elegans* strains Bristol N2 (wild-type), CB1370 *daf-2* (e1370), and CF1038 *daf-16* (mu86) were  
292 maintained on Nematode Growth Medium (NGM) agar plate at 15°C. Animals at the developmental  
293 stage after the last molting and before bearing eggs (“young adult stage”) were picked up and cultured  
294 at 24°C for one day, and then transferred to a microfluidic device maintained at 25°C.

295

### 296 **Fabrication of microfluidic device and culture of *C. elegans* in microfluidic device**

297 Two microfluidic devices, WormFloII and WormFloI<sup>6</sup>, were fabricated by combining conventional  
298 photolithography and soft lithography methods<sup>37</sup>. For WormFloII, a polydimethylsiloxane (PDMS)  
299 chip and a bottom PDMS plate with 1-mm thickness were assembled using the oxygen plasma bonding  
300 method. Food bacteria suspension (*E. coli*, OP50 strain with OD = 0.1 in a buffer containing 50 mM  
301 NaCl, 15 mM K<sub>2</sub>HPO<sub>4</sub>, 96 mM KH<sub>2</sub>PO<sub>4</sub>, 0.3 mM CaCl<sub>2</sub>, 0.3 mM MgSO<sub>4</sub>, 5 μg cholesterol, 1%  
302 Tween80 (Tokyo Chemical Industry Co., Ltd., Japan)) and M9 buffer with/without 1 g/L glucose were

303 supplied to the WormFloII and WormFloI to maintain animals for observation, respectively, at 0.4  
304 ml/h with the Micro Ceram pump (MSP-001, Yamazen Corporation, Japan).

305

### 306 **Observation and quantification of *C. elegans* behavior**

307 Animals cultured in a microfluidic device were soaked in M9 buffer in a 15-cm-diameter glass dish  
308 installed in a temperature-controlled aluminum box<sup>6</sup>. Animals were observed under blue-light-cut  
309 illumination by a macroscope with an apochromat objective lens (1×) (Z16 APO, Leica,  
310 Germany) and recorded in an H264 compressed movie<sup>6</sup>. Animal swimming activity was measured by  
311 counting pixels in a bitmap image, in which animal movement was determined by comparing the image  
312 at the previous time frame (Supplemental Video 1)<sup>6</sup>. The movie compression effect on swimming  
313 activity was corrected on the activity time series by using the moving average<sup>6</sup>.

314

### 315 **Data analysis**

316 For DMA, the fluctuation function  $F(s)$  is obtained by using the mean square root of the detrended  
317 noise round series, defined as

$$318 \quad F(s) = \sqrt{\frac{1}{N} \sum_{i=1}^N (y[i] - \tilde{y}_s[i])^2}. \quad (1)$$

319  $F(s)$  is computed from the DRS  $\{x[i]\}_{i=1}^N$  by the following procedure: the DRS  $\{x[i]\}$  is integrated  
320 after removing its mean value to obtain  $\{y[i]\}$ . This integrated DRS is filtered by the Savitzky-Golay  
321 (SG) filter to estimate the trend round series  $\{\tilde{y}_s[i]\}$ , to obtain the detrended noise round series  
322  $\{y[i] - \tilde{y}_s[i]\}$ . Then, the  $F(s)$  vs  $s$  plot on the log-log scale is fit with a linear function  $y = ax + b$   
323 by the least squares method to estimate the Hurst exponent.

324 For DMCA, the cross-fluctuation function  $F^{(1,2)}$  is obtained by determining the root of cross-  
325 covariance between the bivariate detrended noise round series, defined as

$$326 \quad F^{(1,2)}(s) = \sqrt{\frac{1}{N} \sum_{i=1}^N |(y^{(1)}[i] - \tilde{y}_s^{(1)}[i])(y^{(2)}[i] - \tilde{y}_s^{(2)}[i])|}. \quad (2)$$

327  $F^{(1,2)}(s)$  is computed from bivariate DRSs  $\{(x^{(1)}[i], x^{(2)}[i])\}_{i=1}^N$  by using a procedure analogous to  
328 DMA. The linear fit to the  $F^{(1,2)}(s)$  vs  $s$  plot in the log-log scale can provide an estimate of the  
329 cross Hurst exponent. In addition, the multi-scale correlation coefficient  $\rho^{(1,2)}(s)$ , defined as

$$330 \quad \rho^{(1,2)}(s) = \frac{\sum_{i=1}^N (y^{(1)}[i] - \tilde{y}_s^{(1)}[i])(y^{(2)}[i] - \tilde{y}_s^{(2)}[i])}{\sqrt{\sum_{i=1}^N (y^{(1)}[i] - \tilde{y}_s^{(1)}[i])^2} \sqrt{\sum_{i=1}^N (y^{(2)}[i] - \tilde{y}_s^{(2)}[i])^2}} \quad (3)$$

331 is computed to evaluate the existence of an interaction between bivariate detrended noise round series.

332



333 **Statistical analysis**

334 Due to rejection of the normality hypothesis for scaling exponents in DMA and DMCA, and the power-  
335 law exponents of the residence-time distribution, the non-parametric Wilcoxon rank sum test was  
336 employed for pairwise comparisons between groups. In pairwise comparisons, the Benjamini and  
337 Hochberg method for correcting the false discovery rate (FDR) was used to deal with multiple testing  
338 problems.

339

340

341 **Data availability**

342 The *C. elegans* swimming activity time series and movie data reported in this paper are deposited in  
343 the Systems Science of Biological Dynamics (SSBD) database<sup>38</sup>,  
344 <https://doi.org/10.24631/ssbd.repos.2021.11.001>.

345

346 **References**

- 347 1. Hausdorff, J. M. Gait dynamics, fractals and falls: finding meaning in the stride-to-stride  
348 fluctuations of human walking. *Hum Mov Sci* **26**, 555–589 (2007).
- 349 2. Nakamura, T. *et al.* Universal scaling law in human behavioral organization. *Phys. Rev. Lett.*  
350 (2007) doi:10.1103/PhysRevLett.99.138103.
- 351 3. Nakamura, T. *et al.* Of mice and men - Universality and breakdown of behavioral  
352 organization. *PLoS One* (2008) doi:10.1371/journal.pone.0002050.
- 353 4. Barabási, A. L. The origin of bursts and heavy tails in human dynamics. *Nature* (2005)  
354 doi:10.1038/nature03459.
- 355 5. Balhara, Y. P. Diabetes and psychiatric disorders. *Indian J. Endocrinol. Metab.* (2011)  
356 doi:10.4103/2230-8210.85579.
- 357 6. Ikeda, Y. *et al.* *C. elegans* episodic swimming is driven by multifractal kinetics. *Sci. Rep.*  
358 (2020) doi:10.1038/s41598-020-70319-0.
- 359 7. Cole, B. J. Fractal Time in Animal Behavior - the Movement Activity of *Drosophila*. *Anim.*  
360 *Behav.* **50**, 1317–1324 (1995).
- 361 8. Cole, B. J. Short-Term Activity Cycles in Ants - Generation of Periodicity by Worker  
362 Interaction. *Am. Nat.* **137**, 244–259 (1991).
- 363 9. Schultz, W. Neuronal reward and decision signals: From theories to data. *Physiol. Rev.* (2015)  
364 doi:10.1152/physrev.00023.2014.
- 365 10. Fernandez, A. M. & Torres-Alemán, I. The many faces of insulin-like peptide signalling in the  
366 brain. *Nature Reviews Neuroscience* (2012) doi:10.1038/nrn3209.

- 367 11. Kleinridders, A. *et al.* Insulin resistance in brain alters dopamine turnover and causes  
368 behavioral disorders. *Proc. Natl. Acad. Sci. U. S. A.* (2015) doi:10.1073/pnas.1500877112.
- 369 12. Yanagita, T. *et al.* Neuronal Insulin Receptor Signaling: A Potential Target for the Treatment  
370 of Cognitive and Mood Disorders. in *Mood Disorders* (2013). doi:10.5772/54389.
- 371 13. Kembro, J. M., Flesia, A. G., Gleiser, R. M., Perillo, M. A. & Marin, R. H. Assessment of  
372 long-range correlation in animal behavior time series: The temporal pattern of locomotor  
373 activity of Japanese quail (*Coturnix coturnix*) and mosquito larva (*Culex quinquefasciatus*).  
374 *Phys. a-Statistical Mech. Its Appl.* **392**, 6400–6413 (2013).
- 375 14. Kenyon, C. J. The genetics of ageing. *Nature* (2010) doi:10.1038/nature08980.
- 376 15. Tsujimoto, Y. *et al.* Fast algorithm of long-range cross-correlation analysis using Savitzky-  
377 Golay detrending filter and its application to biosignal analysis. in *2017 International  
378 Conference on Noise and Fluctuations, ICNF 2017* (2017). doi:10.1109/ICNF.2017.7986015.
- 379 16. Nakata, A. *et al.* Generalized theory for detrending moving-average cross-correlation analysis:  
380 A practical guide. *Chaos, Solitons Fractals X* (2019) doi:10.1016/j.csfx.2020.100022.
- 381 17. Kiyono, K. Establishing a direct connection between detrended fluctuation analysis and  
382 Fourier analysis. *Phys Rev E Stat Nonlin Soft Matter Phys* **92**, 42925 (2015).
- 383 18. Ihlen, E. A. Introduction to multifractal detrended fluctuation analysis in matlab. *Front  
384 Physiol* **3**, 141 (2012).
- 385 19. Kiyono, K., Struzik, Z. R. & Yamamoto, Y. Estimator of a non-Gaussian parameter in  
386 multiplicative log-normal models. *Phys. Rev. E* **76**, (2007).
- 387 20. Beggs, J. M. & Plenz, D. Neuronal Avalanches in Neocortical Circuits. *J. Neurosci.* (2003)  
388 doi:10.1523/jneurosci.23-35-11167.2003.
- 389 21. Wilting, J. & Priesemann, V. 25 years of criticality in neuroscience — established results,  
390 open controversies, novel concepts. *Current Opinion in Neurobiology* (2019)  
391 doi:10.1016/j.conb.2019.08.002.
- 392 22. Palva, J. M. *et al.* Neuronal long-range temporal correlations and avalanche dynamics are  
393 correlated with behavioral scaling laws. *Proc. Natl. Acad. Sci. U. S. A.* (2013)  
394 doi:10.1073/pnas.1216855110.
- 395 23. Zimmern, V. Why Brain Criticality Is Clinically Relevant: A Scoping Review. *Frontiers in  
396 Neural Circuits* (2020) doi:10.3389/fncir.2020.00054.
- 397 24. Eurich, C. W., Herrmann, J. M. & Ernst, U. A. Finite-size effects of avalanche dynamics.  
398 *Phys. Rev. E - Stat. Physics, Plasmas, Fluids, Relat. Interdiscip. Top.* (2002)  
399 doi:10.1103/PhysRevE.66.066137.

- 400 25. Benayoun, M., Cowan, J. D., van Drongelen, W. & Wallace, E. Avalanches in a stochastic  
401 model of spiking neurons. *PLoS Comput. Biol.* (2010) doi:10.1371/journal.pcbi.1000846.
- 402 26. Cowan, J. D., Neuman, J. & van Drongelen, W. Wilson–Cowan Equations for Neocortical  
403 Dynamics. *J. Math. Neurosci.* (2016) doi:10.1186/s13408-015-0034-5.
- 404 27. Kuśmierz, Ł., Ogawa, S. & Toyozumi, T. Edge of Chaos and Avalanches in Neural Networks  
405 with Heavy-Tailed Synaptic Weight Distribution. *Phys. Rev. Lett.* (2020)  
406 doi:10.1103/PhysRevLett.125.028101.
- 407 28. Millman, D., Mihalas, S., Kirkwood, A. & Niebur, E. Self-organized criticality occurs in non-  
408 conservative neuronal networks during Up states. *Nat Phys* **6**, 801–805 (2010).
- 409 29. Haldeman, C. & Beggs, J. M. Critical branching captures activity in living neural networks  
410 and maximizes the number of metastable states. *Phys. Rev. Lett.* (2005)  
411 doi:10.1103/PhysRevLett.94.058101.
- 412 30. Beggs, J. M. & Timme, N. Being critical of criticality in the brain. *Front. Physiol.* (2012)  
413 doi:10.3389/fphys.2012.00163.
- 414 31. Huber, S. E. *et al.* Assessment of Fractal Characteristics of Locomotor Activity of Geriatric  
415 In-Patients With Alzheimer’s Dementia. *Front. Aging Neurosci.* (2019)  
416 doi:10.3389/fnagi.2019.00272.
- 417 32. Chiu, S. L. & Cline, H. T. Insulin receptor signaling in the development of neuronal structure  
418 and function. *Neural Development* (2010) doi:10.1186/1749-8104-5-7.
- 419 33. Nieto-Estévez, V., Defterali, Ç. & Vicario-Abejón, C. IGF-I: A key growth factor that  
420 regulates neurogenesis and synaptogenesis from embryonic to adult stages of the brain.  
421 *Frontiers in Neuroscience* (2016) doi:10.3389/fnins.2016.00052.
- 422 34. Korol, S. V., Tafreshiha, A., Bhandage, A. K., Birnir, B. & Jin, Z. Insulin enhances GABAA  
423 receptor-mediated inhibitory currents in rat central amygdala neurons. *Neurosci. Lett.* (2018)  
424 doi:10.1016/j.neulet.2018.02.022.
- 425 35. Liu, P., Chen, B. & Wang, Z. W. GABAergic motor neurons bias locomotor decision-making  
426 in *C. elegans*. *Nat. Commun.* (2020) doi:10.1038/s41467-020-18893-9.
- 427 36. Muñoz, M. A. Colloquium: Criticality and dynamical scaling in living systems. *Rev. Mod.*  
428 *Phys.* (2018) doi:10.1103/RevModPhys.90.031001.
- 429 37. Kimura, H., Yamamoto, T., Sakai, H., Sakai, Y. & Fujii, T. An integrated microfluidic system  
430 for long-term perfusion culture and on-line monitoring of intestinal tissue models. *Lab Chip*  
431 (2008) doi:10.1039/b717091b.
- 432 38. Tohsato, Y., Ho, K. H., Kyoda, K. & Onami, S. SSBD: a database of quantitative data of  
433 spatiotemporal dynamics of biological phenomena. *Bioinformatics* **32**, 3471–3479 (2016).

434

435 **Acknowledgement**

436 We thank the *Caenorhabditis* Genetics Center (CGC) for *C. elegans* strains; the CGC is funded by  
437 NIH Office of Research Infrastructure Programs (P40 OD010440). We thank WormBase for planning  
438 and designing our experiments. We thank the RIKEN Center for Advanced Photonics Advanced  
439 Manufacturing Support Team for the manufacturing apparatus for culture and recording. This study  
440 was supported by JSPS KAKENHI grant number 20K20321 (Grant-in-Aid for Challenging Research  
441 (Exploratory))(Y.A.).

442

443 **Author information**

444 **Affiliations**

445 Cellular Informatics Laboratory, RIKEN, 2-1 Hirosawa, Wako, Saitama, 351-0198, Japan

446 Yusaku Ikeda, Peter Jurica, Yasushi Sako & Yukinobu Arata

447 Department of Mechanical Engineering, School of Engineering, Tokai University, 4-1-1 Kitakaname,

448 Hiratsuka, Kanagawa, 259-1292, Japan

449 Yusaku Ikeda & Hiroshi Kimura

450 Graduate School of Engineering Science, Osaka University, 1-3 Machikaneyama-cho, Toyonaka,

451 Osaka, 560-8531, Japan

452 Ituski Shiga & Ken Kiyono

453

454 **Contributions**

455 Y.I., Y.A., and H.K. carried out the experiments. I.S., P.J., Y.A., and K.K. perform data analysis. K.K.

456 and Y.S. discussed the results and commented on the manuscript. Y.A. conceived the study and wrote

457 the manuscript.

458

459 **Corresponding author**

460 Correspondence to Y. Arata

461

462 **Competing interest declaration**

463 The authors declare no competing interests.

464

465 **Figure legends**

466 **Fig. 1: WormFloII microfluidic device for culturing *C. elegans* with food bacteria in biochemical isolation.**

467 **a**, WormFloII photo. Inlet and outlet portals for liquid media are shown. Yellow dashed line outlines  
468 50 chambers for individually culturing *C. elegans*. **b**, WormFloII schematic. Each chamber is directly  
469 connected to supply (orange) and drain (gray) channels to achieve biochemically independent  
470 environments. **c**, Chamber schematic. Chambers are caged with junctional micro-slit channels (50- $\mu$ m  
471 width and height). Animals are introduced from 0.1-mm hole at chamber roof. Hole is shielded with  
472 PDMS sheet before supplying liquid media.

473

474 **Fig. 2: Activity time series of episodic behavior of fed *C. elegans***

475 Swimming activity time series of wild-type (**a-e**), *daf-2* (**h-l**), and *daf-16* (**o-s**) fed animals for 3 days.  
476 Red-marked regions are magnified in graphs immediately below (e.g., all of **b** represents red region  
477 from **a**; all of **c** represents red region from **b**; etc.). DRSs for active (red) and inactive state (blue) in  
478 wild-type (**f, g**), *daf-2* (**m, n**), and *daf-16* (**t, u**) fed animals were obtained from activity time series for  
479 3 days (**a, h, o**). px: number of pixels where animals moved from previous frame.

480

481 **Fig. 3: Power-law residence-time distributions of behavioral states of fed *C. elegans***

482 Averaged normalized probability density distributions of active (red) and inactive states (blue) of fed  
483 wild-type (**a, b**), *daf-2* (**c, d**), and *daf-16* (**e, f**) animals among individual animals (grey), in log-log  
484 plot. Error bars represent standard deviations. Distributions for inactive state (**b, d, f**) were fit with  
485 linear function from -0.5 to 1.5 on x-axis (black line). Distributions for active state (**a, c, e**) were fit  
486 with linear function from -0.5 to 0.8 and were extrapolated to 1.5 on x-axis (black line).

487

488 **Fig. 4: Long-range auto-/cross-correlations and multiscale cross-correlation coefficients in fed *C. elegans***  
489 **behavior**

490 Averaged noise function  $F(s)$  of active (red) and averaged cross-noise function  $F^{(1,2)}(s)$  (green)  
491 among individual animals (grey) were fit with linear function from 1.1 to 2.1 and from 2.1 to 3.1 across  
492 scale ( $s$ ) at shorter and longer round scale, respectively. Averaged noise function  $F(s)$  of inactive  
493 (blue) DRSs was fit from 1.1 to 3.1. Averaged multiscale cross-correlation coefficient (MCCC; black)  
494 among individual animals (grey) were plotted against scale ( $s$ ) for fed wild-type (**b**), *daf-2* (**e**), and  
495 *daf-16* (**h**). Error bars are standard deviation.

496

497 **Fig. 5: Two-state behavioral transition model**

498 State transition from the active to inactive state is driven by Fractal Kinetics A1 at shorter round scale  
499 (which is affected by Fractal Kinetics C) and is driven by fractal Kinetics A2 at longer round scale  
500 (which is affected by Fractal Kinetics I). State transition from the inactive to active state is driven by  
501 Fractal Kinetics I, which is affected by Fractal Kinetics C at the shorter round scale, and is affected by  
502 Fractal Kinetics A2 at the longer round scale. Insulin signaling targets Fractal Kinetics A1, A2, C, and  
503 the lateral linking mechanism.

504

505 **Extended Data Figure Legends**

506 **Extended Data Fig. 1: Activity time series of episodic behavior of *C. elegans* cultured without food bacteria**

507 Swimming activity time series of starved (**a-e**) and glucose-fed (**h-l**) wild-type animals for 3 days.  
508 Red-marked regions are magnified in graphs immediately below (e.g., all of **b** represents red region  
509 from **a**; all of **c** represents red region from **b**; etc.). Active (red) and inactive (blue) DRSs in starved (**e**,  
510 **f**) and glucose-fed (**k, l**) wild-type animals were obtained from above activity time series for 3 days (**a**,  
511 **h**). px: number of pixels where animals moved from previous frame.

512

513 **Extended Data Fig. 2: Power-law residence-time distributions of behavioral states of *C. elegans* cultured**  
514 **without food bacteria**

515 Averaged normalized probability density distributions of residence time for active (red) and inactive  
516 states (blue) of starved (**a, b**) and glucose-fed (**c, d**) wild-type animals among individual animals (grey),  
517 in log-log plot. Error bars represent standard deviation. Distributions for inactive state (**b, d**) were fit  
518 with a linear function in a range between -0.5 and 1.5 on x-axis (black line), whereas distributions for  
519 active state (**a, c**) were fit with a linear function in a range between -0.5 and 0.8 and were extrapolated  
520 to 1.5 on x-axis (black line).

521

522 **Extended Data Fig. 3: Power-law exponents of residence-time distributions for behavioral states of *C. elegans***  
523 **cultured with/without food bacteria**

524 Box-swarm plots showing raw values and medians with 25th and 75th percentiles of power-law  
525 exponents of residence times for active (**a**) and inactive (**c**) states. Error bars represent standard  
526 deviations. FDR-corrected P-values by pairwise Wilcoxon rank sum test for active (**b**) and inactive (**d**)  
527 states, with P-values > 0.05 shown in grey.

528



529 **Extended Data Fig. 4: Long-range auto-/cross-correlations and multiscale cross-correlation coefficient of**  
530 **DRSs in fed *C. elegans***

531 Averaged noise function  $F(s)$  of active (red) and inactive (blue) DRSs, and averaged cross-noise  
532 function  $F^{(1,2)}(s)$  between active and inactive DRSs (green), among individual animals (grey) were  
533 plotted against scale ( $s$ ) for starved (**a, c**) and glucose-fed (**d, f**) wild-type animals.  $F(s)$  vs ( $s$ )  
534 plots for inactive DRS (blue) were fit with a linear function from 1.1 and 3.1.  $F(s)$  vs ( $s$ ) plots for  
535 active DRS (red) and  $F^{(1,2)}(s)$  vs ( $s$ ) plots (green) were fit in distinct linear functions between 1.1  
536 and 2.1 and between 2.1 and 3.1. Averaged multiscale cross-correlation coefficient between active and  
537 inactive DRSs (MCCC; black) among individual animals (grey) were plotted against scale ( $s$ ) for  
538 starved (**b**) and glucose-fed (**e**) wild-type animals. Error bars represent standard deviations.

539

540 **Extended Data Fig. 5: Hurst exponents of DRS in animals cultured with/without food bacteria**

541 Raw values and medians with 25th and 75th percentiles of Hurst exponents of active DRS at shorter  
542 round scale (**a**), active DRS at longer round scale (**c**), and inactive DRS (**e**). Raw values and medians  
543 with 25th and 75th percentiles of Hurst exponents of a cross-correlated component between active and  
544 inactive DRSs at shorter round scale (**g**) and longer round scale (**i**), obtained from Fig. 4 and Extended  
545 Data Fig. 4, are shown in Box-swarm plot. FDR-corrected P-values from pairwise Wilcoxon rank sum  
546 test are shown in the corresponding combinations (**b, d, f, h, j**). P-values  $> 0.05$  are shown in grey.

547

548 **Extended Data Fig. 6: Cross-correlation coefficient between active and inactive DRSs at  $\log_{10}(s) = 2.5$  in**  
549 **animals cultured with/without food bacteria**

550 (**a**) Box-swarm plots showing raw values and medians with 25th and 75th percentiles of cross-  
551 correlation coefficients between active and inactive DRSs at  $\log_{10}(s) = 2.5$ . (**b**) FDR-corrected P-  
552 values by pairwise Wilcoxon rank sum test, with P-values  $> 0.05$  shown in grey.

553

554 **Extended Data Fig. 7: Stepwise computation of DMA and DMCA at longer round scale and the relation with**  
555 **activity time series**

556 (**a, h, o**) Active (red) and inactive (blue) DRSs in fed wild-type (**a**), fed *daf-2* (**h**), and fed *daf-16*  
557 animals (**o**) at longer round scale (3,000 rounds). (**b-c, i-j, p-q**) Integrated DRSs, obtained by removing  
558 average durations of active (solid line; **b, i, p**) and inactive (solid line; **c, j, q**) DRSs. S-G filter was fit  
559 to integrated active and inactive DRSs, to obtain trend of integrated active (dashed line; **b, i, p**) and  
560 inactive (dashed line; **c, j, q**) DRSs. (**d, k, r**) Detrended noise round series (dNRS) for active (red) and  
561 inactive (blue) DRSs, obtained by removing trend from integrated DRSs. (**e, l, s**) Scatter plots between  
562 active dNRS (y-axis) and inactive dNRS (x-axis). (**f**) Activity time series for active and inactive DRSs

563 in fed wild-type animals at longer round scale (3,000 rounds). **(m, t)** Activity time series in fed *daf-2*  
564 **(m)** and fed *daf-16* **(t)** animals, shown in the same length as fed wild-type animals **(f)** for comparison.  
565 **(g, n, u)** Magnification of 1/100th length of activity time series from **(f, m, t)**. Blue arrows in **(a)**  
566 indicate rounds of very long inactive states in inactive DRS, which correspond to a sudden jump in  
567 integrated DRS and dNRS (blue arrows in **c, d**). Red and blue brackets in **(h, o)** indicate examples of  
568 very long active or inactive rounds that appear at high density, which correspond to a high amplitude  
569 of dNRS (red and blue brackets in **k, r**). Red and blue brackets in **(f)** indicate active and inactive  
570 episodes. Blue arrows in **(g)** indicate examples of short inactive states within an active episode. px:  
571 number of pixels where animals moved from previous frame.

572

573 **Extended Data Fig. 8: Stepwise computation of DMA and DMCA at shorter round scale and the relation with**  
574 **activity time series**

575 **(a, h, o)** Active (red) and inactive (blue) DRSs in fed wild-type **(a)**, fed *daf-2* **(h)**, and fed *daf-16*  
576 animals **(o)** at shorter round scale (100 rounds). **(b-c, i-j, p-q)** Integrated DRSs, obtained by removing  
577 average durations of active (solid line; **b, i, p**) and inactive (solid line; **c, j, q**) DRSs. S-G filter was fit  
578 to integrated active and inactive DRSs, to obtain trend of integrated active (dashed line; **b, i, p**) and  
579 inactive (dashed line; **c, j, q**) DRSs. **(d, k, r)** Detrended noise round series (dNRS) for active (red) and  
580 inactive (blue) DRSs, obtained by removing the trend from the integrated DRSs. **(e, l, s)** Scatter plots  
581 between active dNRS (y-axis) and inactive dNRS (x-axis). **(f)** Activity time series for active and  
582 inactive DRSs in fed wild-type animals at shorter round scale (100 rounds). **(m, t)** Activity time series  
583 in fed *daf-2* **(m)** and fed *daf-16* **(t)** animals, shown in the same length as fed wild-type animals **(f)** for  
584 comparison. Red and blue brackets in DRS **(a)** indicate alternative appearance of consecutive rounds  
585 between longer active states/shorter inactive states (red brackets) and shorter active states/longer  
586 inactive states (blue bracket in **a**). Red and pink brackets in activity time series **(f)** indicate a time  
587 region with high swimming activity (red) or low swimming activity (pink) within a single active  
588 episode. Red brackets in **(m, t)** indicated active episodes. px: number of pixels where animals moved  
589 from previous frame.

590

591

## 592 **Additional Information**

593 Supplementary Information is available for this paper.

594 Correspondence and requests for materials should be addressed to [arata@riken.jp](mailto:arata@riken.jp).

595

596



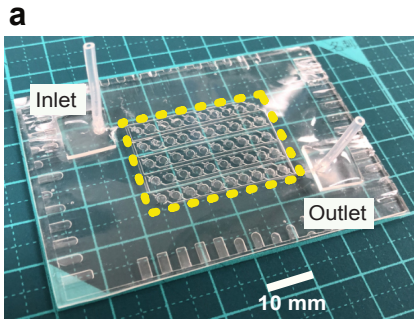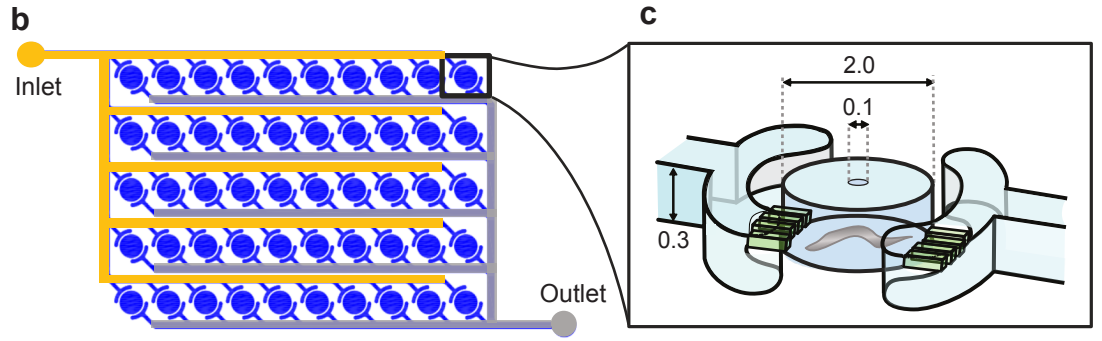

Figure1\_Arata

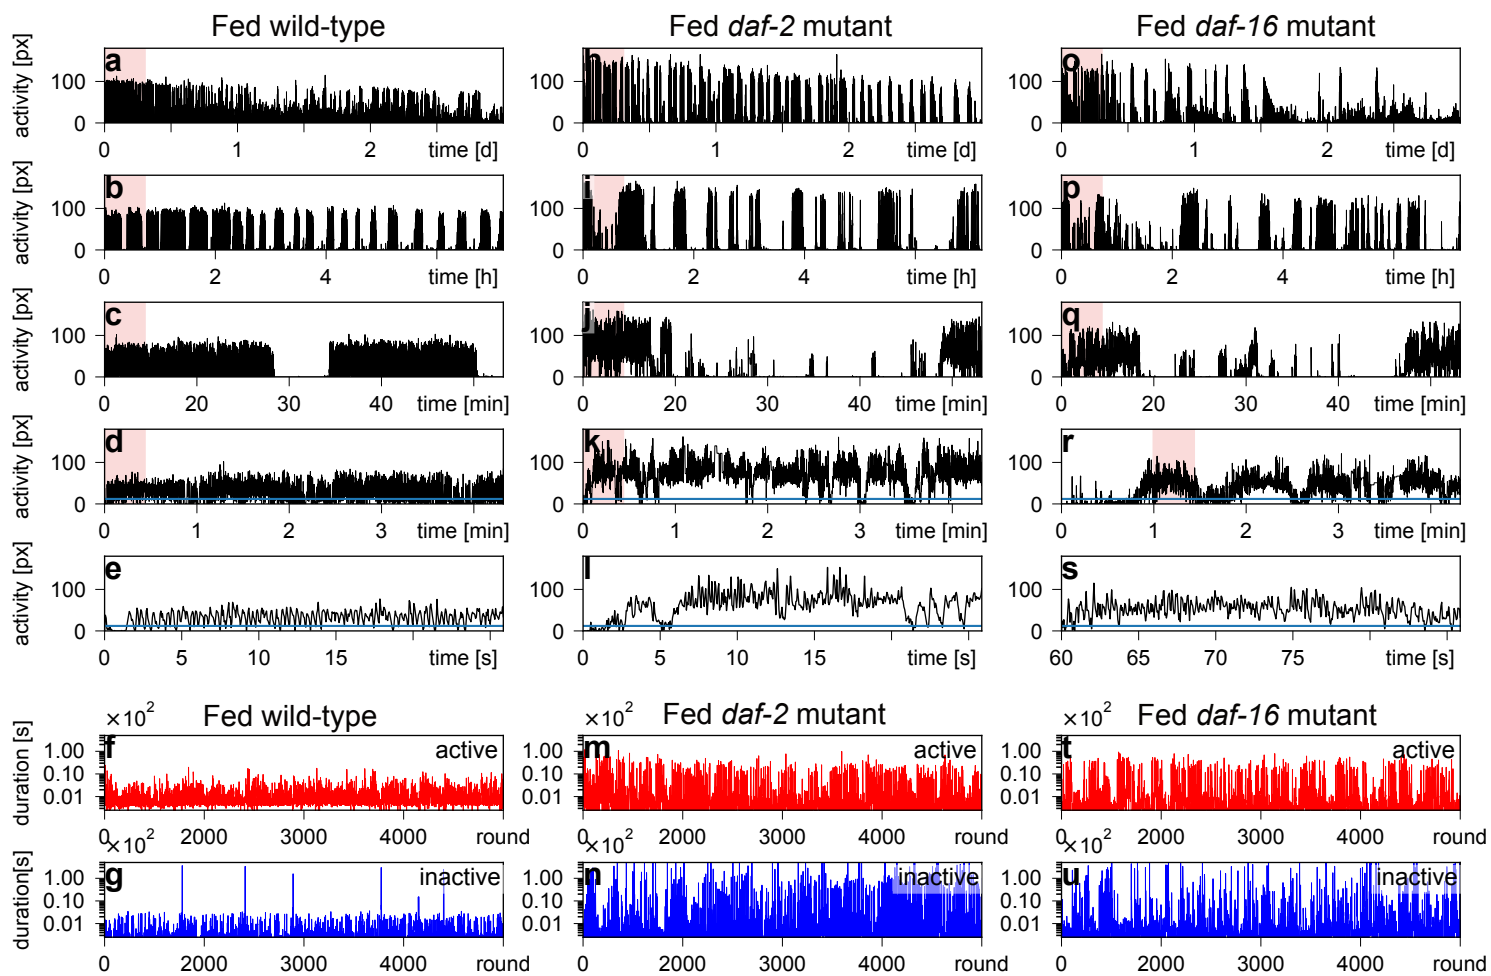

Figure 2\_Arata et al

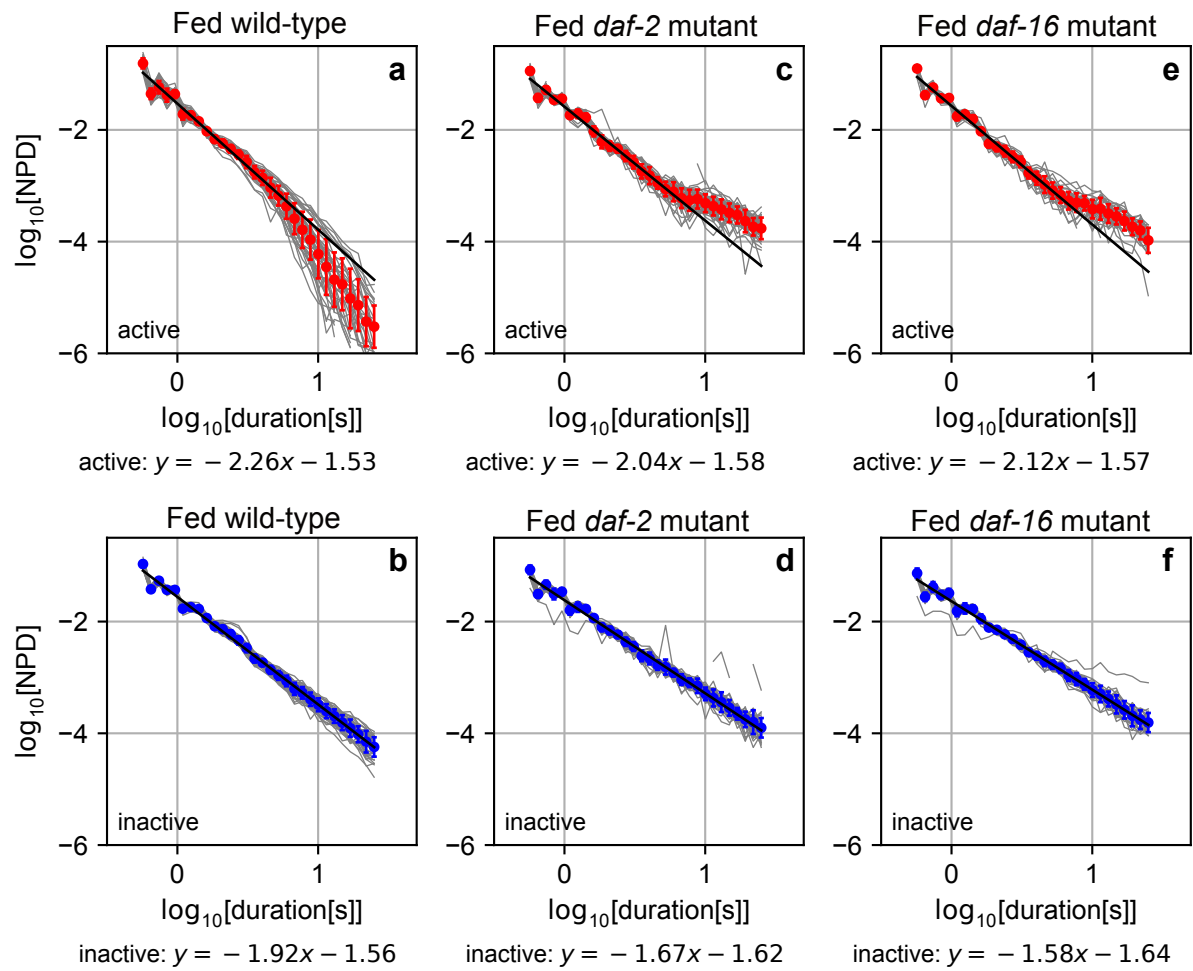

Figure 2\_Arata et al



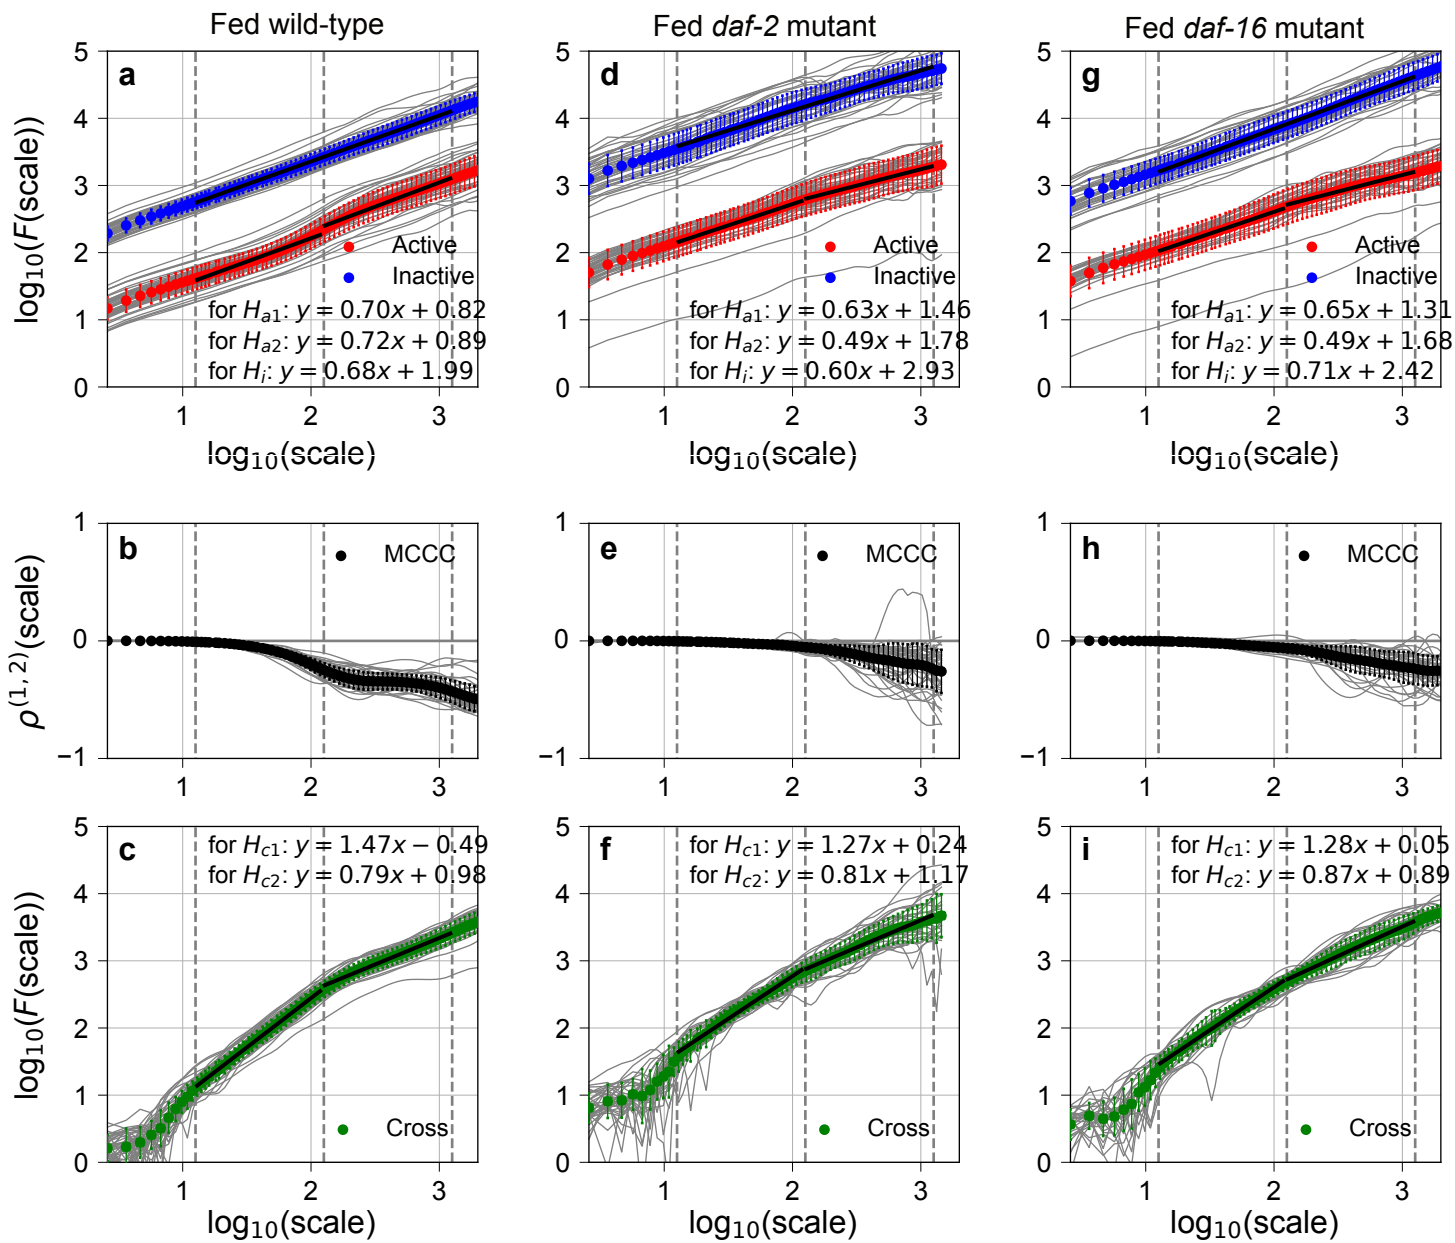

Figure 4\_Arata et al

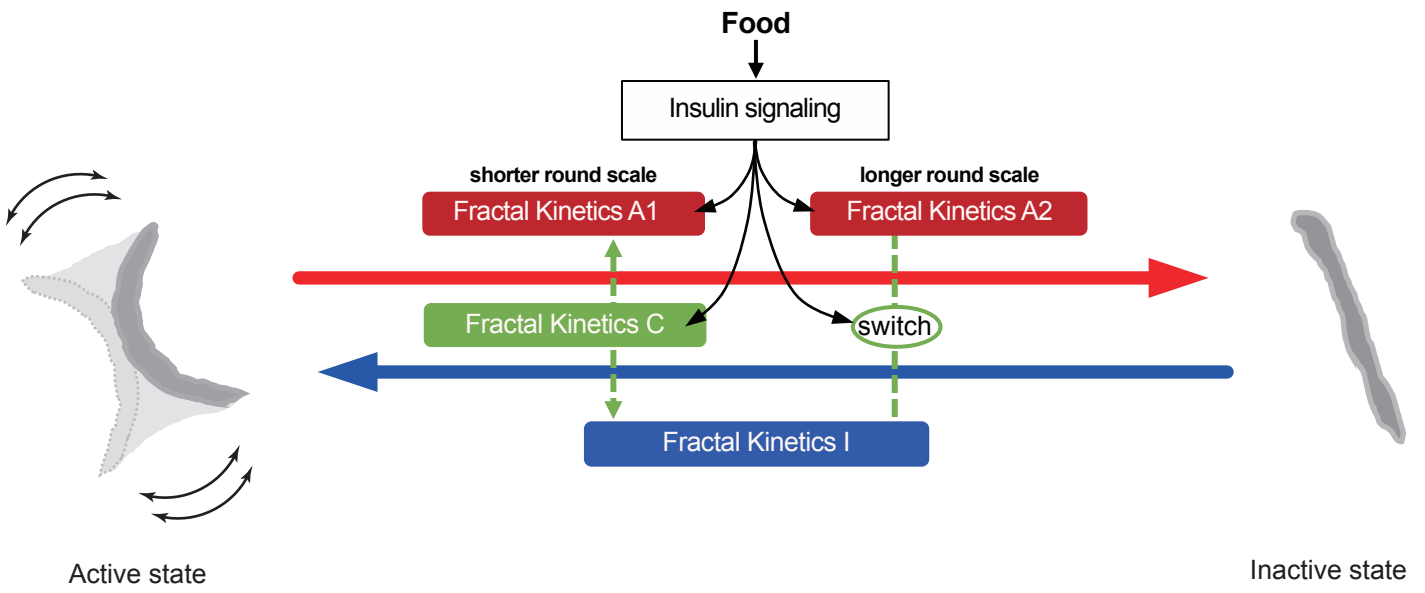

Figure 6\_ Ikeda et al

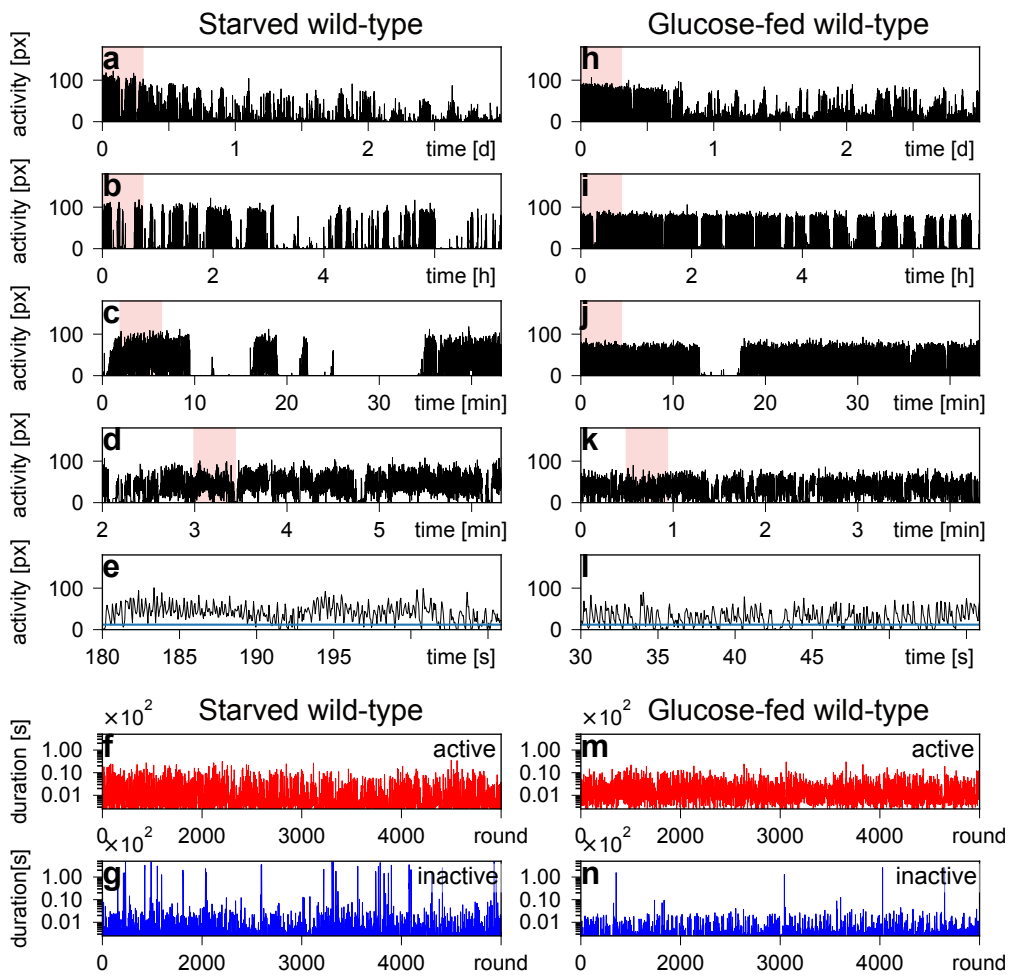

Extended Data Fig. 1\_Arata et al

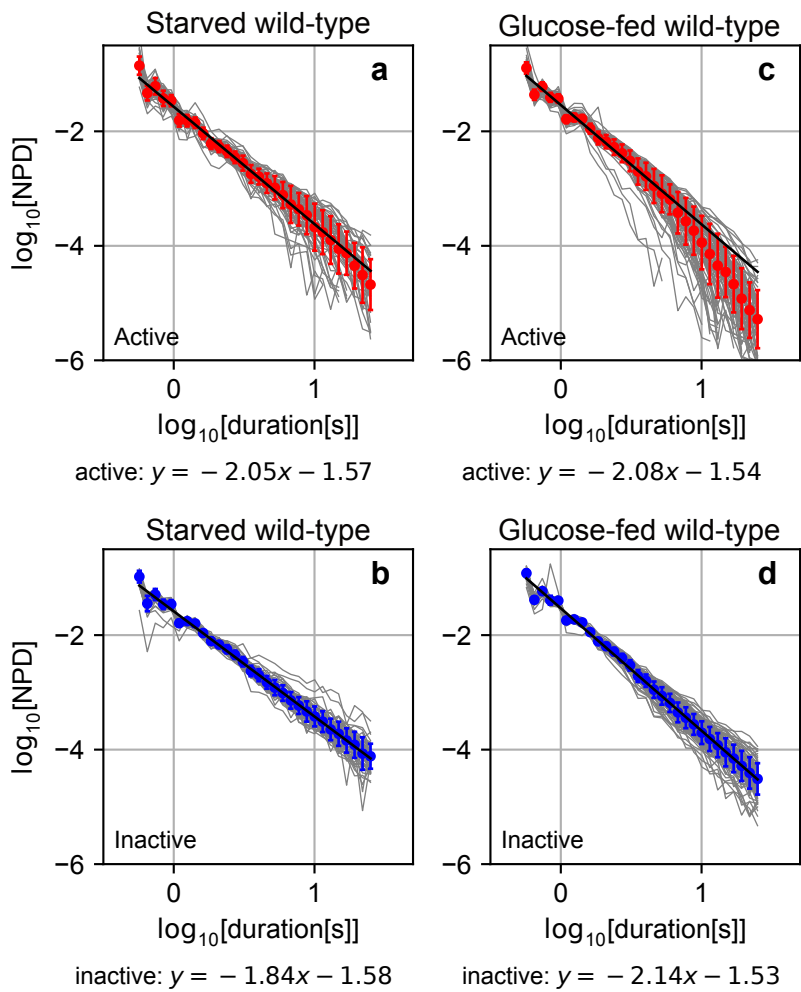

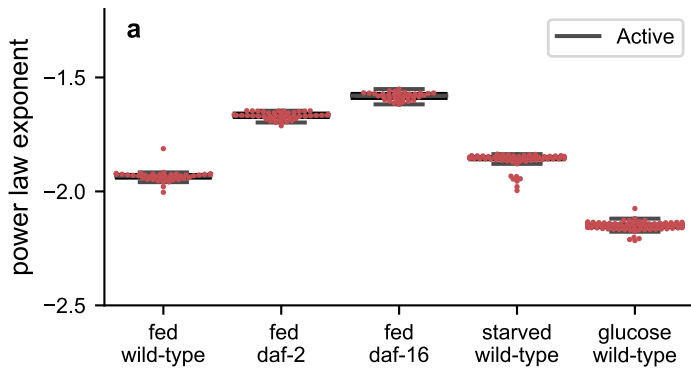

**b**

|                   | fed wild-type | fed daf-2 | fed daf-16 | starved wild-type | glucose wild-type |
|-------------------|---------------|-----------|------------|-------------------|-------------------|
| fed wild-type     | -             | < 0.0001  | < 0.0001   | < 0.0001          | < 0.0001          |
| fed daf-2         | -             | -         | < 0.0001   | < 0.0001          | < 0.0001          |
| fed daf-16        | -             | -         | -          | < 0.0001          | < 0.0001          |
| starved wild-type | -             | -         | -          | -                 | < 0.0001          |
| glucose wild-type | -             | -         | -          | -                 | -                 |

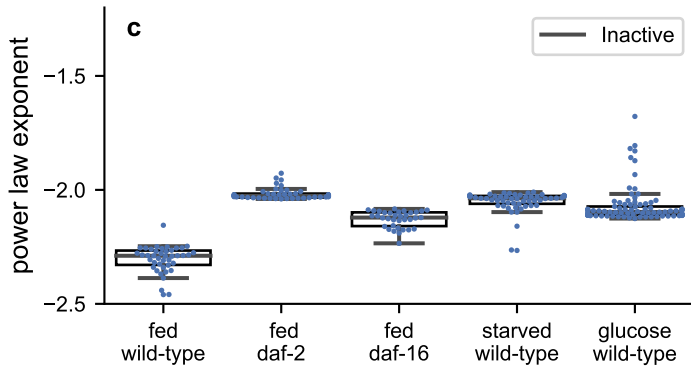

**d**

|                   | fed wild-type | fed daf-2 | fed daf-16 | starved wild-type | glucose wild-type |
|-------------------|---------------|-----------|------------|-------------------|-------------------|
| fed wild-type     | -             | < 0.0001  | < 0.0001   | < 0.0001          | < 0.0001          |
| fed daf-2         | -             | -         | < 0.0001   | < 0.0001          | < 0.0001          |
| fed daf-16        | -             | -         | -          | < 0.0001          | < 0.0001          |
| starved wild-type | -             | -         | -          | -                 | < 0.0001          |
| glucose wild-type | -             | -         | -          | -                 | -                 |

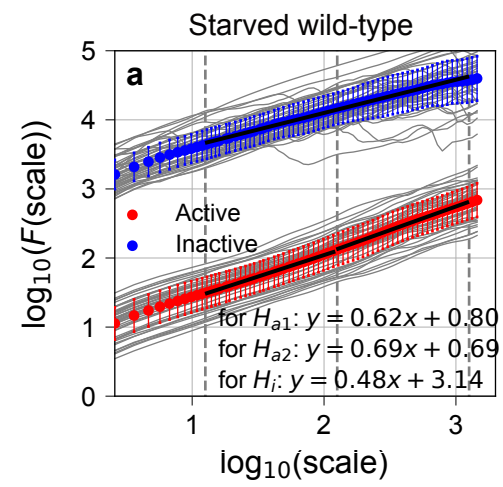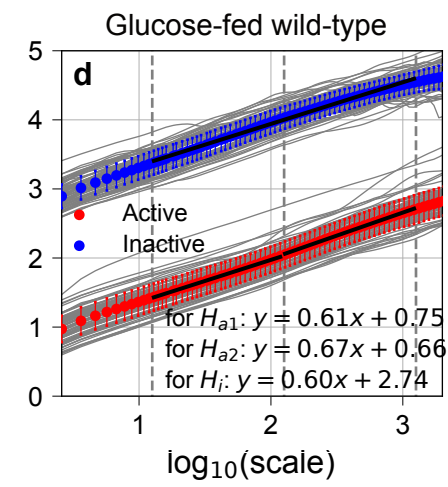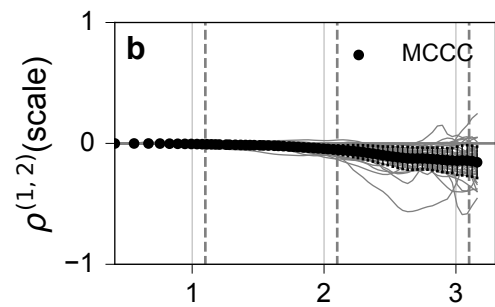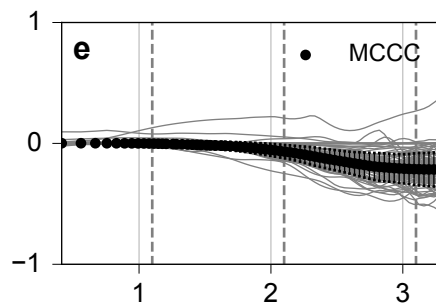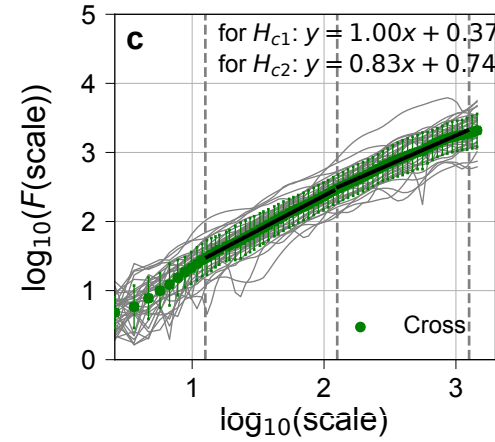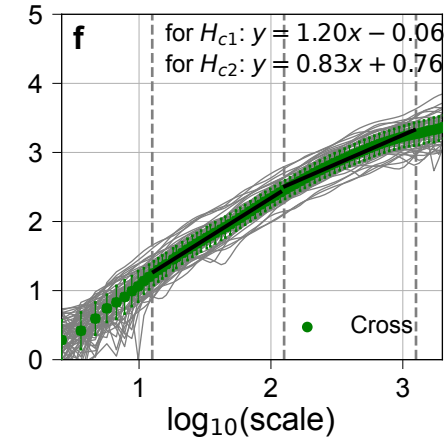



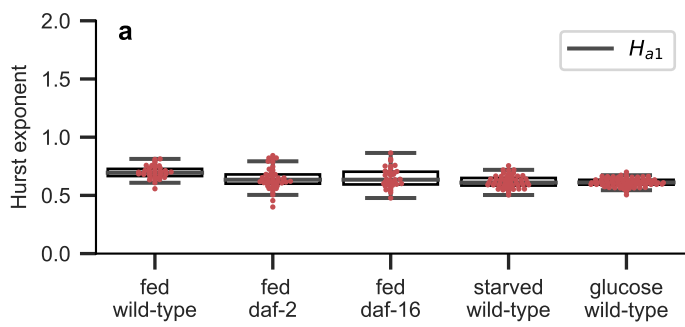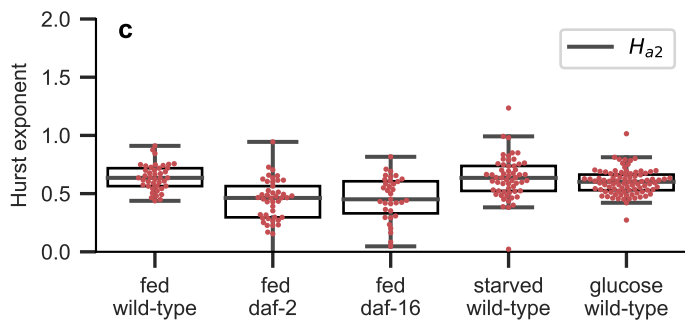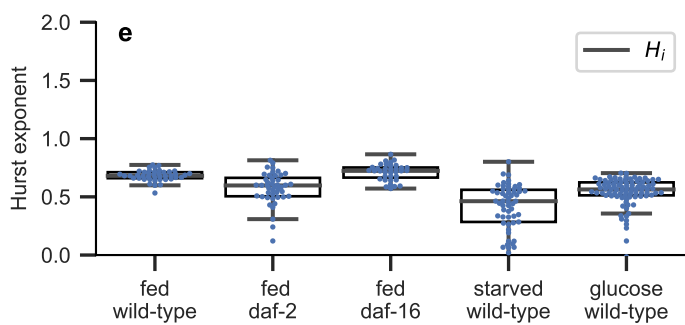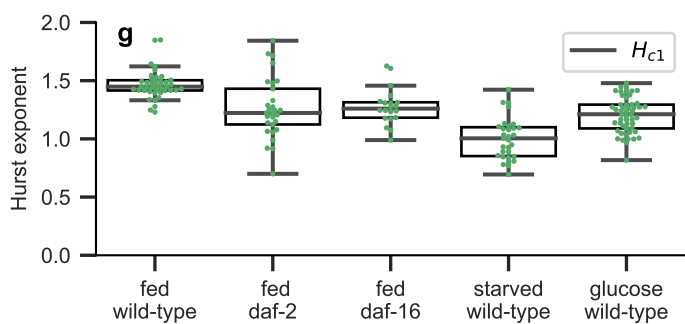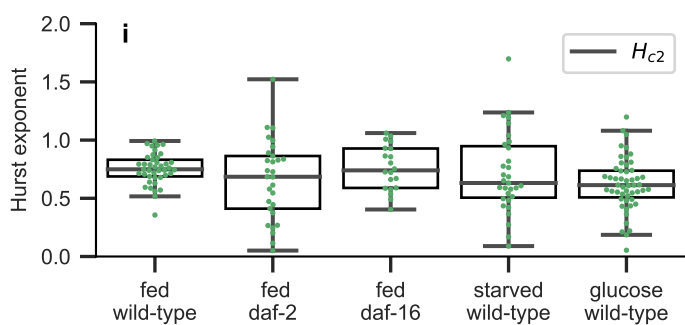

**b**

|                   | fed wild-type | fed daf-2 | fed daf-16 | starved wild-type | glucose wild-type |
|-------------------|---------------|-----------|------------|-------------------|-------------------|
| fed wild-type     | -             | 0.00035   | 0.00917    | < 0.0001          | < 0.0001          |
| fed daf-2         | -             | -         | 0.82726    | 0.139             | 0.0387            |
| fed daf-16        | -             | -         | -          | 0.11868           | 0.04687           |
| starved wild-type | -             | -         | -          | -                 | 0.82726           |
| glucose wild-type | -             | -         | -          | -                 | -                 |

**d**

|                   | fed wild-type | fed daf-2 | fed daf-16 | starved wild-type | glucose wild-type |
|-------------------|---------------|-----------|------------|-------------------|-------------------|
| fed wild-type     | -             | < 0.0001  | < 0.0001   | 0.7716            | 0.05156           |
| fed daf-2         | -             | -         | 0.7167     | < 0.0001          | < 0.0001          |
| fed daf-16        | -             | -         | -          | < 0.0001          | 0.00019           |
| starved wild-type | -             | -         | -          | -                 | 0.17152           |
| glucose wild-type | -             | -         | -          | -                 | -                 |

**f**

|                   | fed wild-type | fed daf-2 | fed daf-16 | starved wild-type | glucose wild-type |
|-------------------|---------------|-----------|------------|-------------------|-------------------|
| fed wild-type     | -             | < 0.0001  | 0.0231     | < 0.0001          | < 0.0001          |
| fed daf-2         | -             | -         | < 0.0001   | < 0.0001          | 0.1741            |
| fed daf-16        | -             | -         | -          | < 0.0001          | < 0.0001          |
| starved wild-type | -             | -         | -          | -                 | < 0.0001          |
| glucose wild-type | -             | -         | -          | -                 | -                 |

**h**

|                   | fed wild-type | fed daf-2 | fed daf-16 | starved wild-type | glucose wild-type |
|-------------------|---------------|-----------|------------|-------------------|-------------------|
| fed wild-type     | -             | < 0.0001  | < 0.0001   | < 0.0001          | < 0.0001          |
| fed daf-2         | -             | -         | 0.2366     | 0.0014            | 0.867             |
| fed daf-16        | -             | -         | -          | < 0.0001          | 0.1874            |
| starved wild-type | -             | -         | -          | -                 | < 0.0001          |
| glucose wild-type | -             | -         | -          | -                 | -                 |

**j**

|                   | fed wild-type | fed daf-2 | fed daf-16 | starved wild-type | glucose wild-type |
|-------------------|---------------|-----------|------------|-------------------|-------------------|
| fed wild-type     | -             | 0.708     | 0.708      | 0.314             | 0.0023            |
| fed daf-2         | -             | -         | 0.7081     | 0.7081            | 0.314             |
| fed daf-16        | -             | -         | -          | 0.529             | 0.0541            |
| starved wild-type | -             | -         | -          | -                 | 0.565             |
| glucose wild-type | -             | -         | -          | -                 | -                 |

Extended Data Fig. 5\_Arata et al

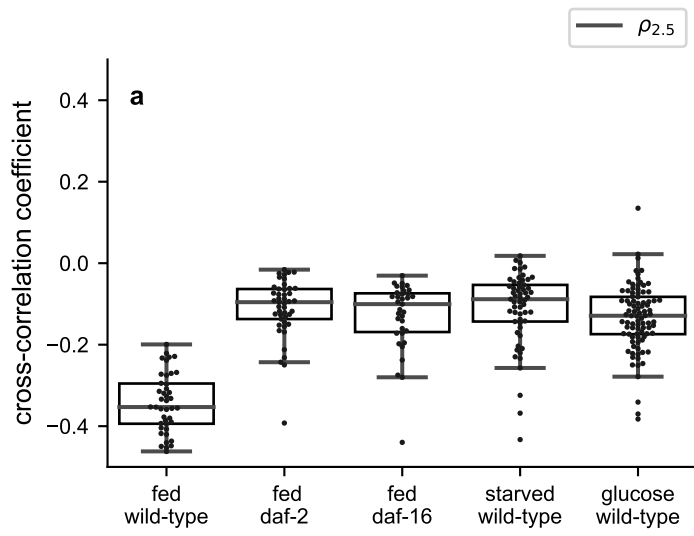

**b**

|                   | fed wild-type | fed daf-2 | fed daf-16 | starved wild-type | glucose wild-type |
|-------------------|---------------|-----------|------------|-------------------|-------------------|
| fed wild-type     | nan           | < 0.0001  | < 0.0001   | < 0.0001          | < 0.0001          |
| fed daf-2         | nan           | nan       | 0.411      | 0.574             | 0.049             |
| fed daf-16        | nan           | nan       | nan        | 0.262             | 0.4107            |
| starved wild-type | nan           | nan       | nan        | nan               | 0.023             |
| glucose wild-type | nan           | nan       | nan        | nan               | -                 |

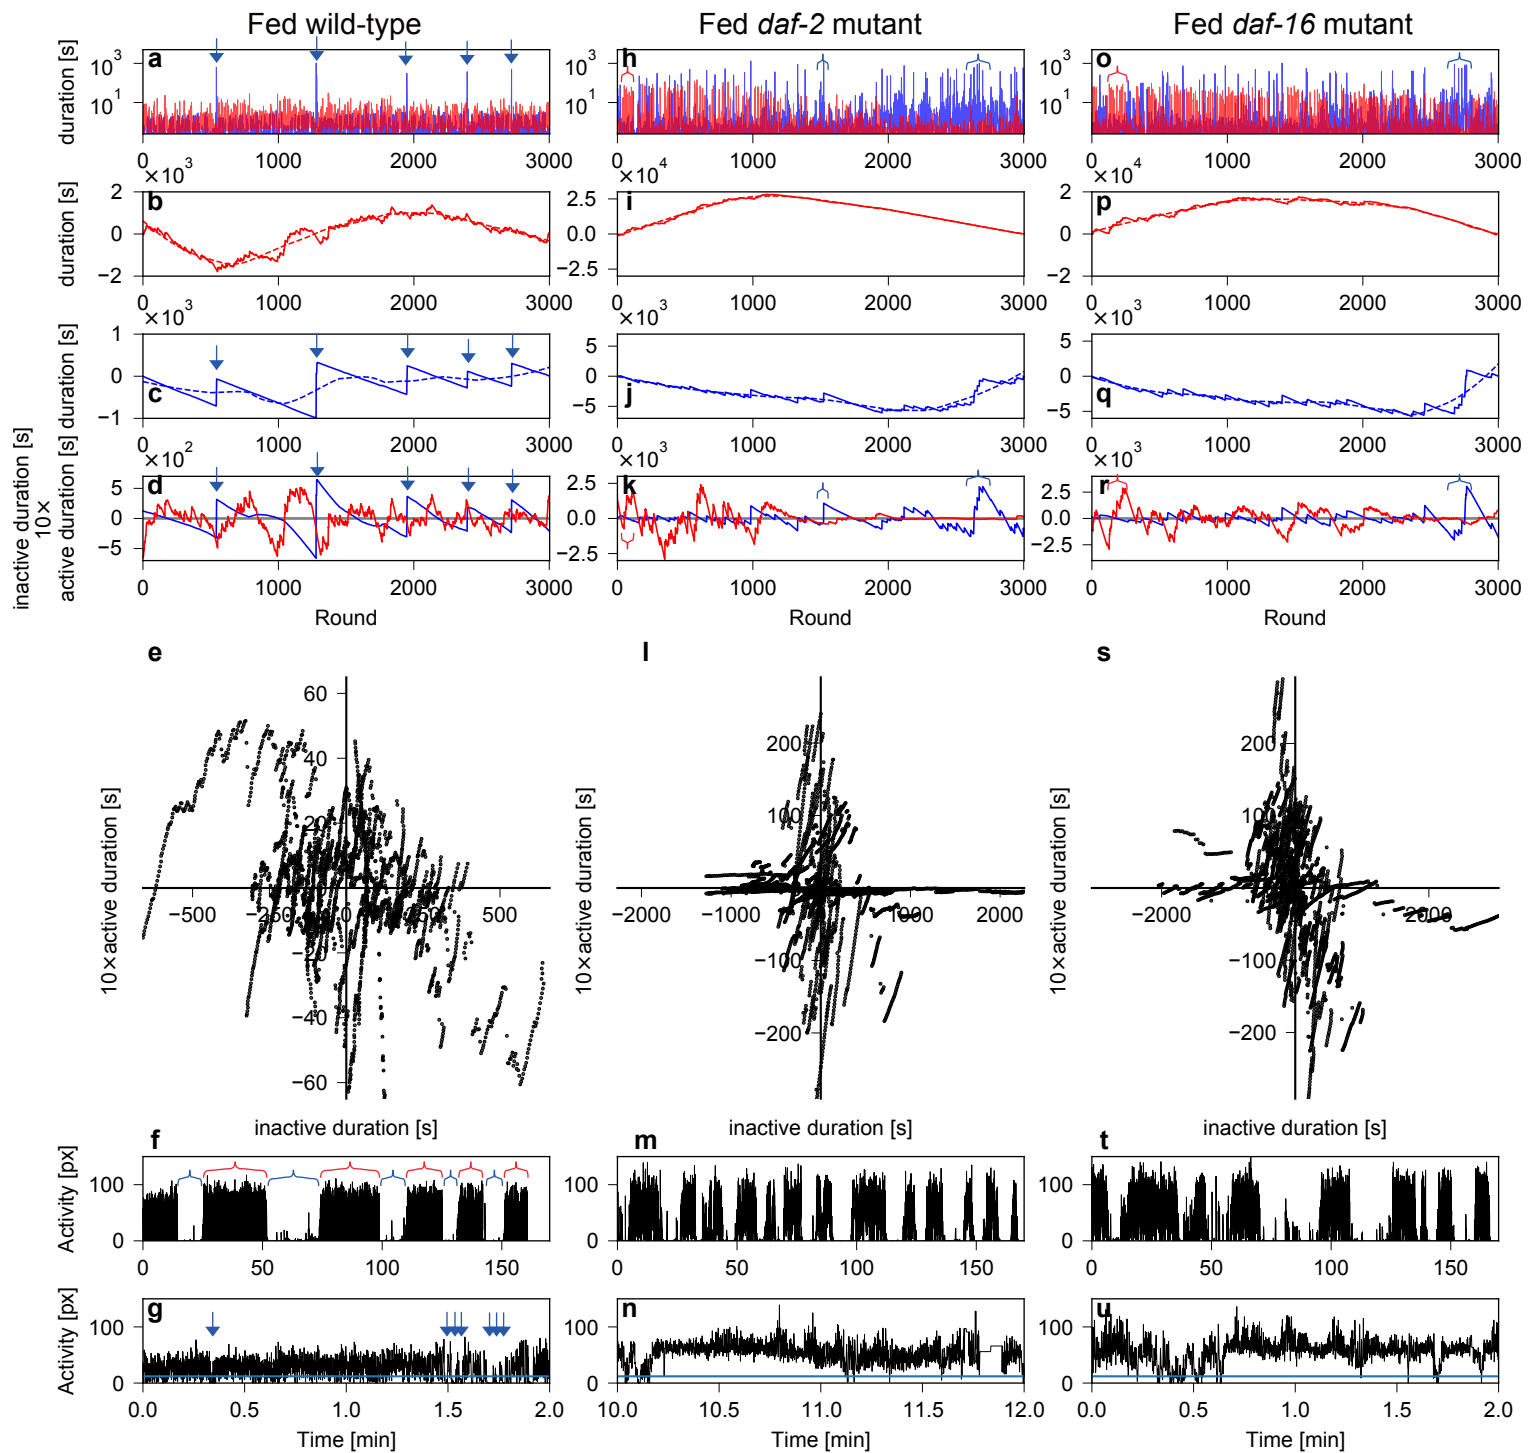

Extended Data Fig. 7\_Arata et al

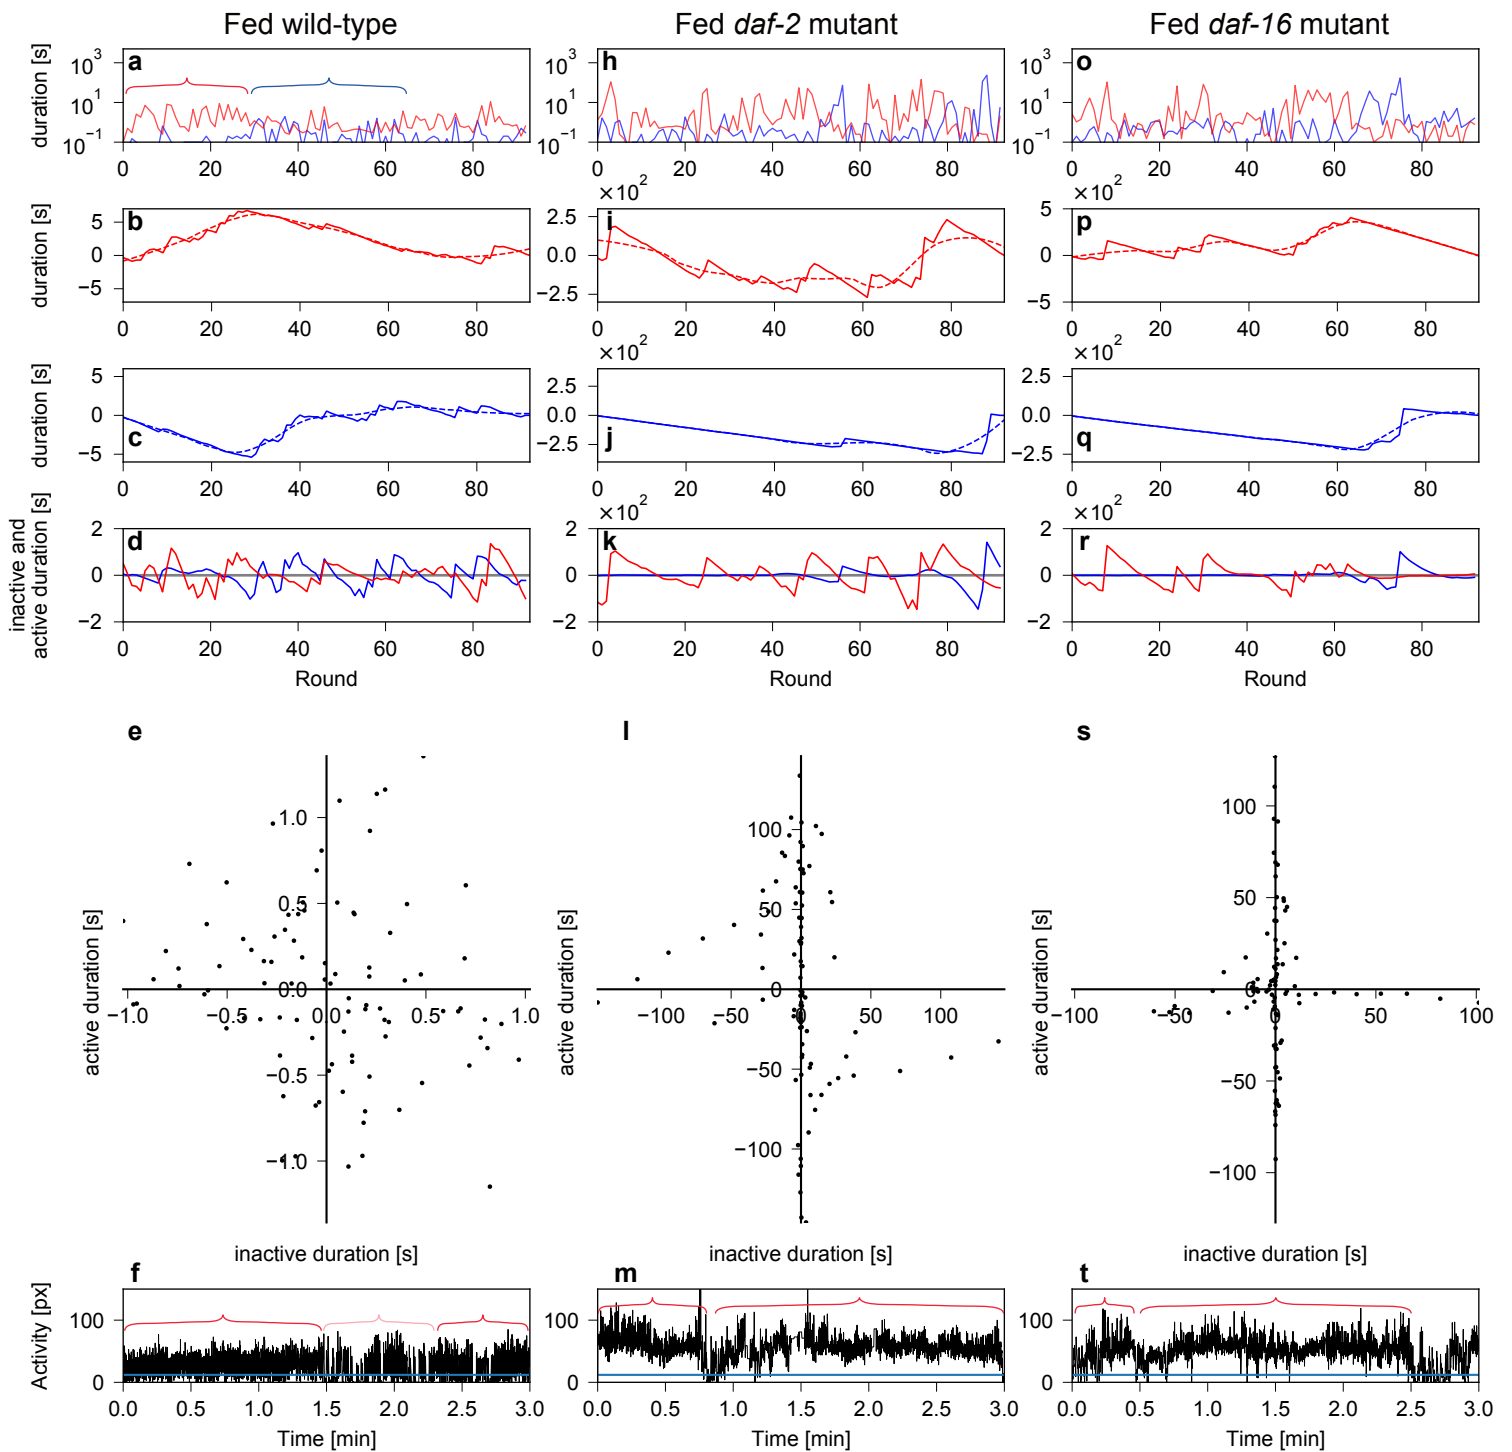

Extended Data Fig. 8\_Arata et al
